# Supplementary material
Source: PubMed Central journal article supplement (PMC4040235)
Supplement: NIHMS57955-supplement-1.pdf [file NIHMS57955-supplement-1.pdf]

**Supplementary Table S1: Impact of strength of the spiked-in gene expression changes on signature performance.**

The impact of multiple mechanisms of resistance on the sensitivity, specificity, positive predictive value (PPV), negative predictive value (NPV) and area under curve (AUC) of receiver operating characteristic (ROC) curves of the predictive gene signatures tested, where the spiked-in gene expression changes were either optimal (2-fold), weak (1.4-fold) or strong (2.8-fold).

| Optimal gene expression changes (2-fold) |                                 |                  |                  |                  |                  |                  |                     |
|------------------------------------------|---------------------------------|------------------|------------------|------------------|------------------|------------------|---------------------|
| Proportion of resistant cases            | Number of resistance mechanisms | Sensitivity      | Specificity      | PPV              | NPV              | Accuracy         | AUC                 |
| 0.5                                      | 1                               | 1.00 (1.00-1.00) | 1.00 (1.00-1.00) | 1.00 (1.00-1.00) | 1.00 (1.00-1.00) | 1.00 (1.00-1.00) | 1.000 (1.000-1.000) |
| 0.5                                      | 2                               | 0.99 (0.97-1.00) | 1.00 (0.99-1.00) | 1.00 (0.99-1.00) | 0.99 (0.97-1.00) | 0.99 (0.98-1.00) | 1.000 (0.999-1.000) |
| 0.5                                      | 3                               | 0.95 (0.93-0.97) | 0.98 (0.96-0.99) | 0.98 (0.96-0.99) | 0.96 (0.93-0.97) | 0.96 (0.95-0.98) | 0.992 (0.987-0.997) |
| 0.5                                      | 4                               | 0.91 (0.87-0.94) | 0.93 (0.90-0.96) | 0.93 (0.90-0.96) | 0.91 (0.87-0.94) | 0.92 (0.89-0.95) | 0.971 (0.955-0.983) |
| 0.5                                      | 5                               | 0.85 (0.80-0.90) | 0.88 (0.82-0.91) | 0.87 (0.82-0.91) | 0.86 (0.80-0.90) | 0.87 (0.81-0.90) | 0.931 (0.886-0.955) |
| 0.6                                      | 1                               | 1.00 (1.00-1.00) | 1.00 (1.00-1.00) | 1.00 (1.00-1.00) | 1.00 (1.00-1.00) | 1.00 (1.00-1.00) | 1.000 (1.000-1.000) |
| 0.6                                      | 2                               | 0.99 (0.97-1.00) | 1.00 (0.99-1.00) | 1.00 (0.99-1.00) | 0.98 (0.96-1.00) | 0.99 (0.98-1.00) | 0.999 (0.997-1.000) |
| 0.6                                      | 3                               | 0.96 (0.94-0.98) | 0.97 (0.94-0.99) | 0.98 (0.96-0.99) | 0.94 (0.91-0.96) | 0.96 (0.94-0.98) | 0.992 (0.985-0.996) |
| 0.6                                      | 4                               | 0.91 (0.87-0.94) | 0.91 (0.86-0.95) | 0.94 (0.91-0.96) | 0.87 (0.82-0.92) | 0.91 (0.88-0.94) | 0.966 (0.943-0.980) |
| 0.6                                      | 5                               | 0.87 (0.83-0.91) | 0.85 (0.79-0.89) | 0.90 (0.85-0.93) | 0.81 (0.75-0.86) | 0.86 (0.81-0.90) | 0.930 (0.882-0.954) |
| 0.7                                      | 1                               | 1.00 (1.00-1.00) | 1.00 (1.00-1.00) | 1.00 (1.00-1.00) | 1.00 (1.00-1.00) | 1.00 (1.00-1.00) | 1.000 (1.000-1.000) |
| 0.7                                      | 2                               | 0.99 (0.98-1.00) | 1.00 (0.99-1.00) | 1.00 (0.99-1.00) | 0.98 (0.95-0.99) | 0.99 (0.98-1.00) | 1.000 (0.998-1.000) |
| 0.7                                      | 3                               | 0.96 (0.92-0.98) | 0.96 (0.93-0.98) | 0.98 (0.97-0.99) | 0.91 (0.83-0.95) | 0.96 (0.93-0.98) | 0.991 (0.977-0.996) |
| 0.7                                      | 4                               | 0.93 (0.88-0.95) | 0.90 (0.84-0.94) | 0.95 (0.93-0.97) | 0.84 (0.74-0.89) | 0.92 (0.87-0.95) | 0.967 (0.933-0.980) |
| 0.7                                      | 5                               | 0.89 (0.85-0.92) | 0.82 (0.76-0.88) | 0.92 (0.89-0.94) | 0.75 (0.68-0.82) | 0.87 (0.82-0.90) | 0.927 (0.888-0.953) |
| 0.8                                      | 1                               | 1.00 (1.00-1.00) | 1.00 (1.00-1.00) | 1.00 (1.00-1.00) | 1.00 (1.00-1.00) | 1.00 (1.00-1.00) | 1.000 (1.000-1.000) |
| 0.8                                      | 2                               | 0.99 (0.98-1.00) | 1.00 (0.98-1.00) | 1.00 (1.00-1.00) | 0.97 (0.94-0.99) | 0.99 (0.98-1.00) | 1.000 (0.998-1.000) |
| 0.8                                      | 3                               | 0.96 (0.93-0.98) | 0.95 (0.90-0.97) | 0.99 (0.97-0.99) | 0.87 (0.77-0.93) | 0.96 (0.93-0.98) | 0.990 (0.974-0.996) |
| 0.8                                      | 4                               | 0.93 (0.90-0.96) | 0.86 (0.81-0.90) | 0.96 (0.95-0.98) | 0.77 (0.67-0.85) | 0.92 (0.89-0.95) | 0.963 (0.933-0.980) |
| 0.8                                      | 5                               | 0.90 (0.86-0.93) | 0.76 (0.71-0.81) | 0.94 (0.92-0.95) | 0.66 (0.55-0.75) | 0.87 (0.83-0.91) | 0.920 (0.870-0.947) |
| 0.9                                      | 1                               | 1.00 (1.00-1.00) | 1.00 (1.00-1.00) | 1.00 (1.00-1.00) | 1.00 (1.00-1.00) | 1.00 (1.00-1.00) | 1.000 (1.000-1.000) |
| 0.9                                      | 2                               | 0.99 (0.98-1.00) | 0.99 (0.96-1.00) | 1.00 (1.00-1.00) | 0.94 (0.86-0.98) | 0.99 (0.98-1.00) | 0.999 (0.998-1.000) |
| 0.9                                      | 3                               | 0.97 (0.95-0.98) | 0.90 (0.85-0.95) | 0.99 (0.98-0.99) | 0.78 (0.62-0.87) | 0.96 (0.93-0.98) | 0.987 (0.967-0.995) |
| 0.9                                      | 4                               | 0.94 (0.91-0.97) | 0.73 (0.66-0.79) | 0.97 (0.96-0.98) | 0.59 (0.46-0.72) | 0.92 (0.89-0.95) | 0.943 (0.898-0.967) |
| 0.9                                      | 5                               | 0.91 (0.85-0.95) | 0.56 (0.49-0.63) | 0.95 (0.94-0.96) | 0.43 (0.28-0.55) | 0.88 (0.82-0.91) | 0.866 (0.786-0.919) |
| 0.95                                     | 1                               | 1.00 (1.00-1.00) | 1.00 (1.00-1.00) | 1.00 (1.00-1.00) | 1.00 (1.00-1.00) | 1.00 (1.00-1.00) | 1.000 (1.000-1.000) |
| 0.95                                     | 2                               | 0.99 (0.98-1.00) | 0.98 (0.92-1.00) | 1.00 (1.00-1.00) | 0.89 (0.70-0.96) | 0.99 (0.98-1.00) | 0.999 (0.994-1.000) |
| 0.95                                     | 3                               | 0.97 (0.92-0.99) | 0.66 (0.48-0.80) | 0.98 (0.97-0.99) | 0.53 (0.26-0.73) | 0.95 (0.90-0.98) | 0.951 (0.864-0.987) |
| 0.95                                     | 4                               | 0.93 (0.88-0.96) | 0.36 (0.24-0.46) | 0.96 (0.96-0.97) | 0.22 (0.13-0.34) | 0.90 (0.85-0.93) | 0.803 (0.728-0.881) |
| 0.95                                     | 5                               | 0.89 (0.84-0.94) | 0.26 (0.19-0.35) | 0.96 (0.95-0.96) | 0.12 (0.08-0.18) | 0.86 (0.81-0.90) | 0.687 (0.619-0.754) |

| Weak gene expression changes (1.4-fold) |                                 |                  |                  |                  |                     |                  |                     |
|-----------------------------------------|---------------------------------|------------------|------------------|------------------|---------------------|------------------|---------------------|
| Proportion of resistant cases           | Number of resistance mechanisms | Sensitivity      | Specificity      | PPV              | NPV                 | Accuracy         | AUC                 |
| 0.5                                     | 1                               | 0.98 (0.96-1.00) | 0.99 (0.96-1.00) | 0.99 (0.97-1.00) | 0.985 (0.962-0.998) | 0.99 (0.97-1.00) | 0.999 (0.996-1.000) |
| 0.5                                     | 2                               | 0.91 (0.87-0.94) | 0.92 (0.87-0.95) | 0.92 (0.87-0.95) | 0.909 (0.872-0.938) | 0.91 (0.87-0.94) | 0.968 (0.935-0.982) |
| 0.5                                     | 3                               | 0.83 (0.77-0.87) | 0.83 (0.77-0.88) | 0.83 (0.77-0.88) | 0.827 (0.775-0.869) | 0.83 (0.77-0.87) | 0.900 (0.844-0.936) |
| 0.5                                     | 4                               | 0.75 (0.70-0.79) | 0.74 (0.69-0.79) | 0.75 (0.70-0.79) | 0.748 (0.697-0.787) | 0.75 (0.70-0.79) | 0.818 (0.762-0.855) |
| 0.5                                     | 5                               | 0.68 (0.63-0.72) | 0.67 (0.63-0.71) | 0.68 (0.64-0.71) | 0.679 (0.642-0.717) | 0.68 (0.64-0.72) | 0.736 (0.689-0.784) |
| 0.6                                     | 1                               | 0.99 (0.97-1.00) | 0.99 (0.97-1.00) | 0.99 (0.98-1.00) | 0.978 (0.955-0.995) | 0.99 (0.97-1.00) | 0.999 (0.996-1.000) |
| 0.6                                     | 2                               | 0.92 (0.89-0.95) | 0.91 (0.87-0.95) | 0.94 (0.91-0.96) | 0.882 (0.844-0.921) | 0.92 (0.89-0.94) | 0.970 (0.949-0.984) |
| 0.6                                     | 3                               | 0.84 (0.80-0.88) | 0.79 (0.74-0.84) | 0.86 (0.82-0.89) | 0.767 (0.706-0.816) | 0.82 (0.77-0.86) | 0.892 (0.843-0.925) |
| 0.6                                     | 4                               | 0.78 (0.73-0.82) | 0.70 (0.63-0.74) | 0.79 (0.75-0.82) | 0.679 (0.609-0.731) | 0.75 (0.69-0.79) | 0.812 (0.747-0.855) |
| 0.6                                     | 5                               | 0.72 (0.69-0.76) | 0.61 (0.57-0.66) | 0.74 (0.71-0.77) | 0.597 (0.558-0.642) | 0.68 (0.65-0.71) | 0.729 (0.682-0.771) |
| 0.7                                     | 1                               | 0.99 (0.97-1.00) | 0.99 (0.96-1.00) | 0.99 (0.99-1.00) | 0.969 (0.932-0.994) | 0.99 (0.97-1.00) | 0.999 (0.996-1.000) |
| 0.7                                     | 2                               | 0.92 (0.89-0.95) | 0.89 (0.84-0.93) | 0.95 (0.93-0.97) | 0.834 (0.771-0.886) | 0.91 (0.88-0.94) | 0.967 (0.944-0.982) |
| 0.7                                     | 3                               | 0.87 (0.81-0.90) | 0.76 (0.70-0.79) | 0.89 (0.86-0.91) | 0.708 (0.617-0.764) | 0.83 (0.78-0.86) | 0.895 (0.845-0.921) |
| 0.7                                     | 4                               | 0.81 (0.74-0.84) | 0.63 (0.57-0.67) | 0.84 (0.81-0.86) | 0.581 (0.502-0.643) | 0.75 (0.70-0.79) | 0.797 (0.738-0.839) |
| 0.7                                     | 5                               | 0.75 (0.69-0.79) | 0.54 (0.49-0.58) | 0.79 (0.77-0.81) | 0.485 (0.432-0.541) | 0.69 (0.65-0.73) | 0.708 (0.659-0.754) |
| 0.8                                     | 1                               | 0.99 (0.97-1.00) | 0.99 (0.97-1.00) | 1.00 (0.99-1.00) | 0.955 (0.905-0.990) | 0.99 (0.97-1.00) | 0.999 (0.996-1.000) |
| 0.8                                     | 2                               | 0.93 (0.90-0.97) | 0.86 (0.81-0.91) | 0.96 (0.95-0.98) | 0.770 (0.672-0.868) | 0.92 (0.88-0.95) | 0.965 (0.933-0.986) |
| 0.8                                     | 3                               | 0.88 (0.82-0.91) | 0.67 (0.61-0.72) | 0.91 (0.90-0.93) | 0.581 (0.470-0.662) | 0.84 (0.78-0.87) | 0.872 (0.810-0.909) |
| 0.8                                     | 4                               | 0.82 (0.77-0.85) | 0.51 (0.45-0.57) | 0.87 (0.86-0.88) | 0.411 (0.341-0.474) | 0.76 (0.71-0.79) | 0.746 (0.692-0.784) |
| 0.8                                     | 5                               | 0.77 (0.71-0.82) | 0.43 (0.37-0.49) | 0.84 (0.83-0.86) | 0.317 (0.279-0.354) | 0.70 (0.65-0.74) | 0.653 (0.619-0.689) |
| 0.9                                     | 1                               | 0.99 (0.97-1.00) | 0.98 (0.94-1.00) | 1.00 (0.99-1.00) | 0.911 (0.801-0.972) | 0.99 (0.97-1.00) | 0.999 (0.994-1.000) |
| 0.9                                     | 2                               | 0.94 (0.90-0.97) | 0.72 (0.65-0.80) | 0.97 (0.96-0.98) | 0.580 (0.438-0.714) | 0.92 (0.88-0.94) | 0.937 (0.883-0.968) |
| 0.9                                     | 3                               | 0.88 (0.82-0.92) | 0.41 (0.33-0.48) | 0.93 (0.92-0.94) | 0.275 (0.206-0.357) | 0.83 (0.78-0.87) | 0.754 (0.692-0.820) |
| 0.9                                     | 4                               | 0.83 (0.77-0.88) | 0.30 (0.22-0.38) | 0.91 (0.91-0.92) | 0.169 (0.138-0.214) | 0.78 (0.73-0.82) | 0.631 (0.581-0.686) |
| 0.9                                     | 5                               | 0.81 (0.73-0.85) | 0.27 (0.18-0.37) | 0.91 (0.90-0.91) | 0.132 (0.109-0.156) | 0.75 (0.70-0.79) | 0.573 (0.527-0.612) |
| 0.95                                    | 1                               | 0.99 (0.98-1.00) | 0.95 (0.88-1.00) | 1.00 (0.99-1.00) | 0.855 (0.695-0.962) | 0.99 (0.97-1.00) | 0.998 (0.990-1.000) |
| 0.95                                    | 2                               | 0.93 (0.87-0.96) | 0.38 (0.27-0.50) | 0.97 (0.96-0.97) | 0.226 (0.120-0.328) | 0.90 (0.84-0.93) | 0.808 (0.703-0.886) |
| 0.95                                    | 3                               | 0.88 (0.83-0.92) | 0.21 (0.12-0.32) | 0.96 (0.95-0.96) | 0.079 (0.054-0.110) | 0.85 (0.80-0.88) | 0.610 (0.550-0.685) |
| 0.95                                    | 4                               | 0.86 (0.80-0.91) | 0.18 (0.07-0.32) | 0.95 (0.95-0.96) | 0.063 (0.042-0.088) | 0.82 (0.77-0.87) | 0.550 (0.502-0.606) |
| 0.95                                    | 5                               | 0.86 (0.81-0.90) | 0.16 (0.07-0.27) | 0.95 (0.95-0.95) | 0.056 (0.037-0.074) | 0.82 (0.78-0.86) | 0.526 (0.463-0.583) |

| Strong gene expression changes (2.8-fold) |                                 |                  |                  |                  |                  |                  |                     |
|-------------------------------------------|---------------------------------|------------------|------------------|------------------|------------------|------------------|---------------------|
| Proportion of resistant cases             | Number of resistance mechanisms | Sensitivity      | Specificity      | PPV              | NPV              | Accuracy         | AUC                 |
| 0.5                                       | 1                               | 1.00 (1.00-1.00) | 1.00 (1.00-1.00) | 1.00 (1.00-1.00) | 1.00 (1.00-1.00) | 1.00 (1.00-1.00) | 1.000 (1.000-1.000) |
| 0.5                                       | 2                               | 1.00 (1.00-1.00) | 1.00 (1.00-1.00) | 1.00 (1.00-1.00) | 1.00 (1.00-1.00) | 1.00 (1.00-1.00) | 1.000 (1.000-1.000) |
| 0.5                                       | 3                               | 0.99 (0.97-1.00) | 1.00 (0.99-1.00) | 1.00 (0.99-1.00) | 0.99 (0.97-1.00) | 0.99 (0.98-1.00) | 1.000 (0.998-1.000) |
| 0.5                                       | 4                               | 0.96 (0.91-0.98) | 0.98 (0.97-0.99) | 0.98 (0.97-0.99) | 0.96 (0.91-0.98) | 0.97 (0.94-0.98) | 0.994 (0.984-0.998) |
| 0.5                                       | 5                               | 0.93 (0.89-0.96) | 0.96 (0.93-0.98) | 0.96 (0.93-0.98) | 0.93 (0.90-0.96) | 0.95 (0.91-0.97) | 0.985 (0.970-0.994) |
| 0.6                                       | 1                               | 1.00 (1.00-1.00) | 1.00 (1.00-1.00) | 1.00 (1.00-1.00) | 1.00 (1.00-1.00) | 1.00 (1.00-1.00) | 1.000 (1.000-1.000) |
| 0.6                                       | 2                               | 1.00 (1.00-1.00) | 1.00 (1.00-1.00) | 1.00 (1.00-1.00) | 1.00 (1.00-1.00) | 1.00 (1.00-1.00) | 1.000 (1.000-1.000) |
| 0.6                                       | 3                               | 0.99 (0.95-1.00) | 1.00 (0.99-1.00) | 1.00 (0.99-1.00) | 0.98 (0.93-1.00) | 0.99 (0.97-1.00) | 0.999 (0.996-1.000) |
| 0.6                                       | 4                               | 0.97 (0.94-0.98) | 0.98 (0.96-0.99) | 0.99 (0.97-0.99) | 0.95 (0.91-0.97) | 0.97 (0.95-0.98) | 0.995 (0.987-0.998) |
| 0.6                                       | 5                               | 0.93 (0.89-0.96) | 0.95 (0.91-0.97) | 0.96 (0.94-0.98) | 0.90 (0.85-0.94) | 0.94 (0.90-0.96) | 0.982 (0.963-0.991) |
| 0.7                                       | 1                               | 1.00 (1.00-1.00) | 1.00 (1.00-1.00) | 1.00 (1.00-1.00) | 1.00 (1.00-1.00) | 1.00 (1.00-1.00) | 1.000 (1.000-1.000) |
| 0.7                                       | 2                               | 1.00 (0.99-1.00) | 1.00 (1.00-1.00) | 1.00 (1.00-1.00) | 1.00 (0.98-1.00) | 1.00 (0.99-1.00) | 1.000 (1.000-1.000) |
| 0.7                                       | 3                               | 0.99 (0.97-1.00) | 1.00 (0.98-1.00) | 1.00 (0.99-1.00) | 0.97 (0.94-0.99) | 0.99 (0.98-1.00) | 0.999 (0.998-1.000) |
| 0.7                                       | 4                               | 0.97 (0.93-0.98) | 0.97 (0.94-0.99) | 0.99 (0.97-0.99) | 0.92 (0.85-0.96) | 0.97 (0.93-0.98) | 0.994 (0.983-0.998) |
| 0.7                                       | 5                               | 0.94 (0.90-0.96) | 0.93 (0.88-0.96) | 0.97 (0.95-0.98) | 0.86 (0.79-0.91) | 0.93 (0.90-0.96) | 0.979 (0.958-0.989) |
| 0.8                                       | 1                               | 1.00 (1.00-1.00) | 1.00 (1.00-1.00) | 1.00 (1.00-1.00) | 1.00 (1.00-1.00) | 1.00 (1.00-1.00) | 1.000 (1.000-1.000) |
| 0.8                                       | 2                               | 1.00 (0.99-1.00) | 1.00 (1.00-1.00) | 1.00 (1.00-1.00) | 1.00 (0.98-1.00) | 1.00 (1.00-1.00) | 1.000 (1.000-1.000) |
| 0.8                                       | 3                               | 0.99 (0.98-1.00) | 0.99 (0.98-1.00) | 1.00 (1.00-1.00) | 0.96 (0.92-0.99) | 0.99 (0.98-1.00) | 0.999 (0.997-1.000) |
| 0.8                                       | 4                               | 0.97 (0.94-0.98) | 0.96 (0.91-0.98) | 0.99 (0.98-1.00) | 0.89 (0.79-0.94) | 0.97 (0.93-0.98) | 0.993 (0.976-0.997) |
| 0.8                                       | 5                               | 0.95 (0.91-0.97) | 0.90 (0.84-0.94) | 0.97 (0.96-0.99) | 0.81 (0.71-0.89) | 0.94 (0.90-0.96) | 0.977 (0.953-0.989) |
| 0.9                                       | 1                               | 1.00 (1.00-1.00) | 1.00 (1.00-1.00) | 1.00 (1.00-1.00) | 1.00 (1.00-1.00) | 1.00 (1.00-1.00) | 1.000 (1.000-1.000) |
| 0.9                                       | 2                               | 1.00 (1.00-1.00) | 1.00 (1.00-1.00) | 1.00 (1.00-1.00) | 1.00 (0.96-1.00) | 1.00 (1.00-1.00) | 1.000 (1.000-1.000) |
| 0.9                                       | 3                               | 0.99 (0.98-1.00) | 0.98 (0.96-1.00) | 1.00 (1.00-1.00) | 0.94 (0.86-0.98) | 0.99 (0.98-1.00) | 0.999 (0.996-1.000) |
| 0.9                                       | 4                               | 0.98 (0.95-0.99) | 0.91 (0.85-0.96) | 0.99 (0.98-1.00) | 0.82 (0.66-0.92) | 0.97 (0.94-0.99) | 0.990 (0.975-0.997) |
| 0.9                                       | 5                               | 0.96 (0.92-0.98) | 0.80 (0.72-0.87) | 0.98 (0.97-0.98) | 0.69 (0.49-0.81) | 0.94 (0.90-0.96) | 0.966 (0.925-0.985) |
| 0.95                                      | 1                               | 1.00 (1.00-1.00) | 1.00 (1.00-1.00) | 1.00 (1.00-1.00) | 1.00 (1.00-1.00) | 1.00 (1.00-      |                     |

**Supplementary Table S2: Performance of gene signatures according to the strength of the spiked-in gene expression changes.**

Comparison of the performance of optimal (2.0-fold), weak (1.4-fold) and strong (2.8-fold) signatures.

| Proportion of resistant cases | Weak signature                  |                     |                     |                     |                     | Optimal signature               |                     |                     |                     |                     | p-value when comparing signature strength |
|-------------------------------|---------------------------------|---------------------|---------------------|---------------------|---------------------|---------------------------------|---------------------|---------------------|---------------------|---------------------|-------------------------------------------|
|                               | Number of resistance mechanisms |                     |                     |                     |                     | Number of resistance mechanisms |                     |                     |                     |                     |                                           |
|                               | 1                               | 2                   | 3                   | 4                   | 5                   | 1                               | 2                   | 3                   | 4                   | 5                   |                                           |
| 0.5*                          | 0.999 (0.996-1.000)             | 0.968 (0.935-0.982) | 0.900 (0.844-0.936) | 0.818 (0.762-0.855) | 0.736 (0.689-0.784) | 1.000 (1.000-1.000)             | 1.000 (0.999-1.000) | 0.992 (0.987-0.997) | 0.971 (0.955-0.983) | 0.931 (0.886-0.955) | < 0.0001                                  |
| 0.6                           | 0.999 (0.996-1.000)             | 0.970 (0.949-0.984) | 0.892 (0.843-0.925) | 0.812 (0.747-0.855) | 0.729 (0.682-0.771) | 1.000 (1.000-1.000)             | 0.999 (0.997-1.000) | 0.992 (0.985-0.996) | 0.966 (0.943-0.980) | 0.930 (0.882-0.954) | < 0.0001                                  |
| 0.7                           | 0.999 (0.996-1.000)             | 0.967 (0.944-0.982) | 0.895 (0.845-0.921) | 0.797 (0.738-0.839) | 0.708 (0.659-0.754) | 1.000 (1.000-1.000)             | 1.000 (0.998-1.000) | 0.991 (0.977-0.996) | 0.967 (0.933-0.980) | 0.927 (0.888-0.953) | < 0.0001                                  |
| 0.8                           | 0.999 (0.996-1.000)             | 0.965 (0.933-0.986) | 0.872 (0.810-0.909) | 0.746 (0.692-0.784) | 0.653 (0.619-0.689) | 1.000 (1.000-1.000)             | 1.000 (0.998-1.000) | 0.990 (0.974-0.996) | 0.963 (0.933-0.980) | 0.920 (0.870-0.947) | < 0.0001                                  |
| 0.9**                         | 0.999 (0.994-1.000)             | 0.937 (0.883-0.968) | 0.754 (0.692-0.820) | 0.631 (0.581-0.686) | 0.573 (0.527-0.612) | 1.000 (1.000-1.000)             | 0.999 (0.998-1.000) | 0.987 (0.967-0.995) | 0.943 (0.898-0.967) | 0.866 (0.786-0.919) | < 0.0001                                  |
| 0.95                          | 0.998 (0.990-1.000)             | 0.808 (0.703-0.886) | 0.610 (0.550-0.685) | 0.550 (0.502-0.606) | 0.526 (0.463-0.583) | 1.000 (1.000-1.000)             | 0.999 (0.994-1.000) | 0.951 (0.864-0.987) | 0.803 (0.728-0.881) | 0.687 (0.619-0.754) | < 0.0001                                  |

| Proportion of resistant cases | Optimal signature               |                     |                     |                     |                     | Strong signature                |                     |                     |                     |                     | p-value when compare signature strength |
|-------------------------------|---------------------------------|---------------------|---------------------|---------------------|---------------------|---------------------------------|---------------------|---------------------|---------------------|---------------------|-----------------------------------------|
|                               | Number of resistance mechanisms |                     |                     |                     |                     | Number of resistance mechanisms |                     |                     |                     |                     |                                         |
|                               | 1                               | 2                   | 3                   | 4                   | 5                   | 1                               | 2                   | 3                   | 4                   | 5                   |                                         |
| 0.5*                          | 1.000 (1.000-1.000)             | 1.000 (0.999-1.000) | 0.992 (0.987-0.997) | 0.971 (0.955-0.983) | 0.931 (0.886-0.955) | 1.000 (1.000-1.000)             | 1.000 (1.000-1.000) | 1.000 (0.998-1.000) | 0.994 (0.984-0.998) | 0.985 (0.970-0.994) | > 0.05                                  |
| 0.6                           | 1.000 (1.000-1.000)             | 0.999 (0.997-1.000) | 0.992 (0.985-0.996) | 0.966 (0.943-0.980) | 0.930 (0.882-0.954) | 1.000 (1.000-1.000)             | 1.000 (1.000-1.000) | 0.999 (0.996-1.000) | 0.995 (0.987-0.998) | 0.982 (0.963-0.991) | > 0.05                                  |
| 0.7                           | 1.000 (1.000-1.000)             | 1.000 (0.998-1.000) | 0.991 (0.977-0.996) | 0.967 (0.933-0.980) | 0.927 (0.888-0.953) | 1.000 (1.000-1.000)             | 1.000 (1.000-1.000) | 0.999 (0.998-1.000) | 0.994 (0.983-0.998) | 0.979 (0.958-0.989) | > 0.05                                  |
| 0.8                           | 1.000 (1.000-1.000)             | 1.000 (0.998-1.000) | 0.990 (0.974-0.996) | 0.963 (0.933-0.980) | 0.920 (0.870-0.947) | 1.000 (1.000-1.000)             | 1.000 (1.000-1.000) | 0.999 (0.997-1.000) | 0.993 (0.976-0.997) | 0.977 (0.953-0.989) | > 0.05                                  |
| 0.9**                         | 1.000 (1.000-1.000)             | 0.999 (0.998-1.000) | 0.987 (0.967-0.995) | 0.943 (0.898-0.967) | 0.866 (0.786-0.919) | 1.000 (1.000-1.000)             | 1.000 (1.000-1.000) | 0.999 (0.996-1.000) | 0.990 (0.975-0.997) | 0.966 (0.925-0.985) | > 0.05                                  |
| 0.95                          | 1.000 (1.000-1.000)             | 0.999 (0.994-1.000) | 0.951 (0.864-0.987) | 0.803 (0.728-0.881) | 0.687 (0.619-0.754) | 1.000 (1.000-1.000)             | 1.000 (1.000-1.000) | 0.997 (0.991-1.000) | 0.959 (0.893-0.988) | 0.850 (0.757-0.929) | 0.005                                   |

**Supplementary Table S3: Impact of distinct mechanisms of resistance on signatures generated using superPC.**

Analysis of the impact of distinct mechanisms of resistance on the area under the curve (AUC) of receiver operating characteristic (ROC) curves derived with the predictive gene signatures generated using superPC.

| Proportion of resistant cases | Optimal signature (2.0-fold)    |                     |                     |                     |                     | p-value for trend |
|-------------------------------|---------------------------------|---------------------|---------------------|---------------------|---------------------|-------------------|
|                               | Number of resistance mechanisms |                     |                     |                     |                     |                   |
|                               | 1                               | 2                   | 3                   | 4                   | 5                   |                   |
| 0.5*                          | 0.997 (0.991-0.999)             | 0.991 (0.982-0.997) | 0.920 (0.829-0.963) | 0.640 (0.544-0.731) | 0.662 (0.604-0.718) | < 0.0001          |
| 0.6                           | 0.915 (0.912-0.919)             | 0.912 (0.908-0.915) | 0.884 (0.831-0.907) | 0.632 (0.492-0.768) | 0.617 (0.554-0.686) | < 0.0001          |
| 0.7                           | 0.856 (0.852-0.860)             | 0.852 (0.847-0.856) | 0.831 (0.793-0.848) | 0.594 (0.467-0.737) | 0.587 (0.516-0.661) | < 0.0001          |
| 0.8                           | 0.811 (0.808-0.815)             | 0.807 (0.803-0.812) | 0.765 (0.704-0.801) | 0.583 (0.437-0.738) | 0.569 (0.502-0.647) | < 0.0001          |
| 0.9**                         | 0.776 (0.773-0.780)             | 0.772 (0.761-0.777) | 0.673 (0.588-0.741) | 0.575 (0.452-0.710) | 0.575 (0.506-0.629) | < 0.0001          |
| 0.95                          | 0.761 (0.757-0.765)             | 0.739 (0.697-0.759) | 0.627 (0.565-0.691) | 0.585 (0.526-0.645) | 0.564 (0.526-0.601) | < 0.0001          |

  

| Proportion of resistant cases | Weak signature (1.4-fold)       |                     |                     |                     |                     | p-value for trend |
|-------------------------------|---------------------------------|---------------------|---------------------|---------------------|---------------------|-------------------|
|                               | Number of resistance mechanisms |                     |                     |                     |                     |                   |
|                               | 1                               | 2                   | 3                   | 4                   | 5                   |                   |
| 0.5*                          | 0.938 (0.859-0.988)             | 0.763 (0.673-0.856) | 0.652 (0.593-0.702) | 0.623 (0.584-0.666) | 0.591 (0.559-0.621) | 0.0005            |
| 0.6                           | 0.892 (0.849-0.914)             | 0.770 (0.654-0.855) | 0.627 (0.580-0.680) | 0.616 (0.576-0.656) | 0.587 (0.555-0.619) | > 0.05            |
| 0.7                           | 0.841 (0.811-0.855)             | 0.718 (0.632-0.808) | 0.604 (0.556-0.650) | 0.602 (0.567-0.641) | 0.579 (0.547-0.613) | < 0.0001          |
| 0.8                           | 0.797 (0.768-0.811)             | 0.674 (0.590-0.750) | 0.593 (0.548-0.630) | 0.582 (0.544-0.611) | 0.560 (0.531-0.584) | < 0.0001          |
| 0.9**                         | 0.753 (0.720-0.773)             | 0.630 (0.568-0.697) | 0.570 (0.530-0.612) | 0.547 (0.514-0.583) | 0.529 (0.495-0.561) | < 0.0001          |
| 0.95                          | 0.712 (0.675-0.750)             | 0.579 (0.530-0.639) | 0.537 (0.491-0.593) | 0.522 (0.483-0.570) | 0.511 (0.474-0.553) | < 0.0001          |

  

| Proportion of resistant cases | Strong signature (2.8-fold)     |                     |                     |                     |                     | p-value for trend |
|-------------------------------|---------------------------------|---------------------|---------------------|---------------------|---------------------|-------------------|
|                               | Number of resistance mechanisms |                     |                     |                     |                     |                   |
|                               | 1                               | 2                   | 3                   | 4                   | 5                   |                   |
| 0.5*                          | 0.999 (0.999-0.999)             | 0.999 (0.998-0.999) | 0.992 (0.980-0.997) | 0.607 (0.435-0.745) | 0.573 (0.501-0.663) | < 0.0001          |
| 0.6                           | 0.915 (0.912-0.918)             | 0.912 (0.908-0.916) | 0.910 (0.905-0.913) | 0.569 (0.383-0.783) | 0.537 (0.461-0.645) | < 0.0001          |
| 0.7                           | 0.856 (0.852-0.860)             | 0.853 (0.848-0.857) | 0.850 (0.846-0.854) | 0.572 (0.370-0.830) | 0.513 (0.405-0.620) | 0.0013            |
| 0.8                           | 0.812 (0.808-0.817)             | 0.808 (0.805-0.813) | 0.805 (0.801-0.809) | 0.578 (0.449-0.764) | 0.515 (0.396-0.663) | 0.0046            |
| 0.9**                         | 0.777 (0.772-0.781)             | 0.774 (0.769-0.777) | 0.768 (0.754-0.774) | 0.558 (0.390-0.727) | 0.519 (0.424-0.609) | 0.0021            |
| 0.95                          | 0.762 (0.758-0.765)             | 0.759 (0.755-0.763) | 0.711 (0.655-0.746) | 0.586 (0.477-0.687) | 0.572 (0.502-0.625) | < 0.0001          |

Perturbed datasets in which s% (s%=5%, 10%, 20%, 30%, 40% or 50%) of the cases were designated to be therapy sensitive were generated. Within the 1-s% resistant cases, we allocated the cases randomly into n (n=1, 2, 3, 4, 5) equally-sized groups of resistance mechanisms. For each nth resistance mechanism, 100 genes were randomly selected as the “true” gene expression changes and were spiked-in by v (v=0.5, 1, 1.5). Classification was performed using superPC. For each combination of s, n and v, we repeated the spiking and classification 100 times. The mean value and the 95% confidence intervals of the AUCs for each combination of s, n and v are shown. For v=0.5,1,1.5, the sections are labeled “Optimal signature (2-fold)”, “Weak signature (1.4-fold)” and “Strong signature (2.8-fold)” respectively. The last column shows the p-values for the trend tests as the number of resistance mechanisms is increased from 1 to 5 for a given s%.

\*: ideal setting; \*\*: clinically-realistic setting

**Supplementary Table S4: Impact of signature strength on signature performance, when signatures are generated with SuperPC.**

Analysis of the impact of multiple mechanisms of resistance on the sensitivity, specificity, positive predictive value (PPV), negative predictive value (NPV) and area under curve (AUC) of receiver operating characteristic (ROC) curves of the predictive gene signatures generated with superPC, where the spiked-in gene expression changes were optimal (2-fold), weak (1.4-fold) or strong (2.8-fold), and comparisons of their performances.

| Optimal gene expression changes (2-fold) |                                 |                  |                  |                  |                     |                  |                     |
|------------------------------------------|---------------------------------|------------------|------------------|------------------|---------------------|------------------|---------------------|
| Proportion of resistant cases            | Number of resistance mechanisms | Sensitivity      | Specificity      | PPV              | NPV                 | Accuracy         | AUC                 |
| 0.5                                      | 1                               | 1.00 (0.99-1.00) | 1.00 (0.99-1.00) | 1.00 (0.99-1.00) | 0.998 (0.991-1.000) | 1.00 (0.99-1.00) | 0.997 (0.991-0.999) |
| 0.5                                      | 2                               | 0.99 (0.98-1.00) | 0.99 (0.98-1.00) | 0.99 (0.98-1.00) | 0.990 (0.981-0.997) | 0.99 (0.98-1.00) | 0.991 (0.982-0.997) |
| 0.5                                      | 3                               | 0.92 (0.83-0.96) | 0.92 (0.83-0.96) | 0.92 (0.83-0.96) | 0.920 (0.828-0.963) | 0.92 (0.83-0.96) | 0.920 (0.829-0.963) |
| 0.5                                      | 4                               | 0.65 (0.55-0.74) | 0.63 (0.54-0.73) | 0.64 (0.54-0.73) | 0.641 (0.544-0.732) | 0.64 (0.54-0.73) | 0.640 (0.544-0.731) |
| 0.5                                      | 5                               | 0.67 (0.61-0.72) | 0.66 (0.59-0.71) | 0.66 (0.60-0.72) | 0.663 (0.605-0.718) | 0.66 (0.60-0.72) | 0.662 (0.604-0.718) |
| 0.6                                      | 1                               | 0.83 (0.82-0.84) | 1.00 (1.00-1.00) | 1.00 (1.00-1.00) | 0.799 (0.792-0.805) | 0.90 (0.89-0.90) | 0.915 (0.912-0.919) |
| 0.6                                      | 2                               | 0.82 (0.82-0.83) | 1.00 (1.00-1.00) | 1.00 (1.00-1.00) | 0.792 (0.785-0.798) | 0.89 (0.89-0.90) | 0.912 (0.908-0.915) |
| 0.6                                      | 3                               | 0.80 (0.76-0.82) | 0.97 (0.90-1.00) | 0.97 (0.92-1.00) | 0.765 (0.715-0.787) | 0.87 (0.82-0.89) | 0.884 (0.831-0.907) |
| 0.6                                      | 4                               | 0.61 (0.50-0.72) | 0.65 (0.49-0.82) | 0.73 (0.59-0.86) | 0.529 (0.392-0.661) | 0.63 (0.49-0.76) | 0.632 (0.492-0.768) |
| 0.6                                      | 5                               | 0.60 (0.55-0.65) | 0.64 (0.56-0.72) | 0.71 (0.65-0.78) | 0.513 (0.453-0.580) | 0.61 (0.55-0.68) | 0.617 (0.554-0.686) |
| 0.7                                      | 1                               | 0.71 (0.70-0.72) | 1.00 (1.00-1.00) | 1.00 (1.00-1.00) | 0.599 (0.592-0.606) | 0.80 (0.79-0.80) | 0.856 (0.852-0.860) |
| 0.7                                      | 2                               | 0.70 (0.69-0.71) | 1.00 (1.00-1.00) | 1.00 (1.00-1.00) | 0.592 (0.585-0.599) | 0.79 (0.79-0.80) | 0.852 (0.847-0.856) |
| 0.7                                      | 3                               | 0.69 (0.67-0.70) | 0.97 (0.92-1.00) | 0.98 (0.95-1.00) | 0.574 (0.542-0.589) | 0.77 (0.74-0.79) | 0.831 (0.793-0.848) |
| 0.7                                      | 4                               | 0.56 (0.49-0.64) | 0.63 (0.45-0.83) | 0.78 (0.67-0.90) | 0.379 (0.271-0.499) | 0.58 (0.48-0.70) | 0.594 (0.467-0.737) |
| 0.7                                      | 5                               | 0.56 (0.52-0.60) | 0.62 (0.52-0.73) | 0.77 (0.71-0.84) | 0.374 (0.313-0.435) | 0.58 (0.52-0.63) | 0.587 (0.516-0.661) |
| 0.8                                      | 1                               | 0.62 (0.62-0.63) | 1.00 (1.00-1.00) | 1.00 (1.00-1.00) | 0.398 (0.394-0.403) | 0.70 (0.69-0.70) | 0.811 (0.808-0.815) |
| 0.8                                      | 2                               | 0.62 (0.61-0.62) | 1.00 (1.00-1.00) | 1.00 (1.00-1.00) | 0.393 (0.388-0.399) | 0.69 (0.68-0.70) | 0.807 (0.803-0.812) |
| 0.8                                      | 3                               | 0.60 (0.58-0.62) | 0.93 (0.83-0.99) | 0.97 (0.93-1.00) | 0.367 (0.329-0.390) | 0.66 (0.63-0.69) | 0.765 (0.704-0.801) |
| 0.8                                      | 4                               | 0.54 (0.48-0.59) | 0.63 (0.40-0.88) | 0.85 (0.76-0.95) | 0.252 (0.160-0.350) | 0.55 (0.46-0.65) | 0.583 (0.437-0.738) |
| 0.8                                      | 5                               | 0.53 (0.51-0.56) | 0.61 (0.50-0.73) | 0.84 (0.80-0.89) | 0.243 (0.200-0.294) | 0.55 (0.51-0.60) | 0.569 (0.502-0.647) |
| 0.9                                      | 1                               | 0.55 (0.55-0.56) | 1.00 (1.00-1.00) | 1.00 (1.00-1.00) | 0.201 (0.198-0.203) | 0.60 (0.59-0.60) | 0.776 (0.773-0.780) |
| 0.9                                      | 2                               | 0.55 (0.54-0.55) | 1.00 (1.00-1.00) | 1.00 (1.00-1.00) | 0.198 (0.192-0.201) | 0.59 (0.58-0.60) | 0.772 (0.761-0.777) |
| 0.9                                      | 3                               | 0.53 (0.51-0.54) | 0.82 (0.66-0.94) | 0.96 (0.93-0.99) | 0.163 (0.133-0.187) | 0.56 (0.53-0.58) | 0.673 (0.588-0.741) |
| 0.9                                      | 4                               | 0.52 (0.49-0.54) | 0.63 (0.41-0.88) | 0.93 (0.88-0.98) | 0.128 (0.083-0.176) | 0.53 (0.48-0.57) | 0.575 (0.452-0.710) |
| 0.9                                      | 5                               | 0.52 (0.51-0.53) | 0.63 (0.50-0.73) | 0.93 (0.90-0.95) | 0.128 (0.102-0.147) | 0.53 (0.51-0.55) | 0.575 (0.506-0.629) |
| 0.95                                     | 1                               | 0.52 (0.52-0.53) | 1.00 (1.00-1.00) | 1.00 (1.00-1.00) | 0.100 (0.099-0.102) | 0.55 (0.54-0.55) | 0.761 (0.757-0.765) |
| 0.95                                     | 2                               | 0.52 (0.51-0.52) | 0.96 (0.88-1.00) | 1.00 (0.99-1.00) | 0.095 (0.087-0.100) | 0.54 (0.53-0.55) | 0.739 (0.697-0.759) |
| 0.95                                     | 3                               | 0.51 (0.50-0.52) | 0.75 (0.63-0.86) | 0.98 (0.96-0.99) | 0.072 (0.060-0.083) | 0.52 (0.51-0.53) | 0.627 (0.565-0.691) |
| 0.95                                     | 4                               | 0.51 (0.50-0.51) | 0.66 (0.55-0.78) | 0.97 (0.95-0.98) | 0.066 (0.055-0.078) | 0.52 (0.51-0.53) | 0.585 (0.526-0.645) |
| 0.95                                     | 5                               | 0.50 (0.50-0.51) | 0.63 (0.55-0.70) | 0.96 (0.95-0.97) | 0.063 (0.055-0.070) | 0.51 (0.50-0.52) | 0.564 (0.526-0.601) |

| Weak gene expression changes (1.4-fold) |                                 |                  |                  |                  |                     |                  |                     |
|-----------------------------------------|---------------------------------|------------------|------------------|------------------|---------------------|------------------|---------------------|
| Proportion of resistant cases           | Number of resistance mechanisms | Sensitivity      | Specificity      | PPV              | NPV                 | Accuracy         | AUC                 |
| 0.5                                     | 1                               | 0.94 (0.86-0.99) | 0.94 (0.86-0.99) | 0.94 (0.86-0.99) | 0.939 (0.857-0.989) | 0.94 (0.86-0.99) | 0.938 (0.859-0.988) |
| 0.5                                     | 2                               | 0.76 (0.67-0.85) | 0.76 (0.67-0.86) | 0.76 (0.67-0.86) | 0.764 (0.674-0.854) | 0.76 (0.67-0.86) | 0.763 (0.673-0.856) |
| 0.5                                     | 3                               | 0.65 (0.59-0.71) | 0.65 (0.59-0.70) | 0.65 (0.59-0.70) | 0.654 (0.594-0.705) | 0.65 (0.59-0.70) | 0.652 (0.593-0.702) |
| 0.5                                     | 4                               | 0.62 (0.59-0.67) | 0.62 (0.58-0.66) | 0.62 (0.58-0.67) | 0.623 (0.584-0.666) | 0.62 (0.58-0.67) | 0.623 (0.584-0.666) |
| 0.5                                     | 5                               | 0.59 (0.56-0.63) | 0.59 (0.56-0.62) | 0.59 (0.56-0.62) | 0.590 (0.558-0.621) | 0.59 (0.56-0.62) | 0.591 (0.559-0.621) |
| 0.6                                     | 1                               | 0.81 (0.77-0.83) | 0.97 (0.92-1.00) | 0.98 (0.94-1.00) | 0.775 (0.732-0.797) | 0.88 (0.83-0.90) | 0.892 (0.849-0.914) |
| 0.6                                     | 2                               | 0.71 (0.62-0.78) | 0.83 (0.69-0.93) | 0.86 (0.75-0.94) | 0.658 (0.548-0.739) | 0.78 (0.65-0.84) | 0.770 (0.654-0.855) |
| 0.6                                     | 3                               | 0.60 (0.56-0.65) | 0.65 (0.60-0.72) | 0.72 (0.68-0.77) | 0.523 (0.477-0.573) | 0.62 (0.58-0.67) | 0.627 (0.580-0.680) |
| 0.6                                     | 4                               | 0.59 (0.56-0.63) | 0.64 (0.59-0.69) | 0.71 (0.67-0.75) | 0.512 (0.474-0.551) | 0.61 (0.57-0.65) | 0.616 (0.576-0.656) |
| 0.6                                     | 5                               | 0.57 (0.54-0.59) | 0.61 (0.56-0.64) | 0.68 (0.65-0.71) | 0.484 (0.453-0.515) | 0.58 (0.55-0.61) | 0.587 (0.555-0.619) |
| 0.7                                     | 1                               | 0.70 (0.68-0.71) | 0.98 (0.94-1.00) | 0.99 (0.96-1.00) | 0.584 (0.559-0.598) | 0.78 (0.76-0.80) | 0.841 (0.811-0.855) |
| 0.7                                     | 2                               | 0.63 (0.58-0.68) | 0.81 (0.69-0.94) | 0.89 (0.81-0.96) | 0.482 (0.410-0.556) | 0.68 (0.61-0.76) | 0.718 (0.632-0.808) |
| 0.7                                     | 3                               | 0.56 (0.53-0.59) | 0.64 (0.58-0.71) | 0.79 (0.75-0.83) | 0.387 (0.347-0.425) | 0.59 (0.55-0.63) | 0.604 (0.556-0.650) |
| 0.7                                     | 4                               | 0.56 (0.54-0.58) | 0.64 (0.59-0.69) | 0.79 (0.76-0.82) | 0.386 (0.356-0.419) | 0.59 (0.56-0.62) | 0.602 (0.567-0.641) |
| 0.7                                     | 5                               | 0.55 (0.53-0.56) | 0.61 (0.57-0.66) | 0.77 (0.74-0.80) | 0.366 (0.339-0.394) | 0.57 (0.54-0.59) | 0.579 (0.547-0.613) |
| 0.8                                     | 1                               | 0.61 (0.60-0.62) | 0.98 (0.93-1.00) | 0.99 (0.97-1.00) | 0.387 (0.371-0.398) | 0.69 (0.67-0.70) | 0.797 (0.768-0.811) |
| 0.8                                     | 2                               | 0.57 (0.54-0.60) | 0.78 (0.64-0.90) | 0.91 (0.86-0.96) | 0.310 (0.257-0.358) | 0.61 (0.56-0.66) | 0.674 (0.590-0.750) |
| 0.8                                     | 3                               | 0.54 (0.52-0.55) | 0.65 (0.58-0.71) | 0.86 (0.83-0.88) | 0.259 (0.230-0.282) | 0.56 (0.53-0.58) | 0.593 (0.548-0.630) |
| 0.8                                     | 4                               | 0.53 (0.52-0.54) | 0.63 (0.57-0.68) | 0.85 (0.83-0.87) | 0.252 (0.228-0.270) | 0.55 (0.53-0.57) | 0.582 (0.544-0.611) |
| 0.8                                     | 5                               | 0.52 (0.51-0.53) | 0.60 (0.55-0.64) | 0.84 (0.82-0.85) | 0.237 (0.219-0.253) | 0.54 (0.52-0.55) | 0.580 (0.531-0.584) |
| 0.9                                     | 1                               | 0.54 (0.53-0.55) | 0.96 (0.90-1.00) | 0.99 (0.98-1.00) | 0.191 (0.180-0.198) | 0.59 (0.57-0.60) | 0.753 (0.720-0.773) |
| 0.9                                     | 2                               | 0.52 (0.51-0.54) | 0.74 (0.63-0.86) | 0.95 (0.92-0.97) | 0.147 (0.125-0.172) | 0.54 (0.52-0.57) | 0.630 (0.568-0.697) |
| 0.9                                     | 3                               | 0.51 (0.50-0.52) | 0.63 (0.56-0.71) | 0.92 (0.91-0.94) | 0.126 (0.111-0.141) | 0.52 (0.51-0.54) | 0.570 (0.530-0.612) |
| 0.9                                     | 4                               | 0.51 (0.50-0.52) | 0.59 (0.52-0.65) | 0.92 (0.90-0.93) | 0.117 (0.105-0.130) | 0.51 (0.50-0.53) | 0.547 (0.514-0.583) |
| 0.9                                     | 5                               | 0.50 (0.49-0.51) | 0.55 (0.49-0.62) | 0.91 (0.90-0.92) | 0.111 (0.099-0.122) | 0.51 (0.49-0.52) | 0.529 (0.495-0.561) |
| 0.95                                    | 1                               | 0.51 (0.51-0.52) | 0.91 (0.84-0.99) | 0.99 (0.98-1.00) | 0.090 (0.083-0.097) | 0.53 (0.52-0.54) | 0.712 (0.675-0.750) |
| 0.95                                    | 2                               | 0.50 (0.49-0.51) | 0.66 (0.56-0.77) | 0.97 (0.96-0.98) | 0.065 (0.056-0.077) | 0.51 (0.50-0.52) | 0.579 (0.530-0.639) |
| 0.95                                    | 3                               | 0.50 (0.49-0.51) | 0.57 (0.48-0.68) | 0.96 (0.95-0.97) | 0.055 (0.047-0.065) | 0.50 (0.49-0.51) | 0.537 (0.491-0.593) |
| 0.95                                    | 4                               | 0.50 (0.49-0.51) | 0.55 (0.47-0.64) | 0.95 (0.95-0.96) | 0.054 (0.047-0.064) | 0.50 (0.49-0.51) | 0.522 (0.483-0.570) |
| 0.95                                    | 5                               | 0.50 (0.49-0.50) | 0.52 (0.45-0.60) | 0.95 (0.94-0.96) | 0.052 (0.045-0.060) | 0.50 (0.49-0.51) | 0.511 (0.474-0.553) |

| Strong gene expression changes (2.8-fold) |                                 |                  |                  |                  |                     |                  |                     |
|-------------------------------------------|---------------------------------|------------------|------------------|------------------|---------------------|------------------|---------------------|
| Proportion of resistant cases             | Number of resistance mechanisms | Sensitivity      | Specificity      | PPV              | NPV                 | Accuracy         | AUC                 |
| 0.5                                       | 1                               | 1.00 (1.00-1.00) | 1.00 (1.00-1.00) | 1.00 (1.00-1.00) | 1.000 (1.000-1.000) | 1.00 (1.00-1.00) | 0.999 (0.999-0.999) |
| 0.5                                       | 2                               | 1.00 (1.00-1.00) | 1.00 (1.00-1.00) | 1.00 (1.00-1.00) | 0.998 (0.996-0.999) | 1.00 (1.00-1.00) | 0.999 (0.998-0.999) |
| 0.5                                       | 3                               | 0.99 (0.98-1.00) | 0.99 (0.98-1.00) | 0.99 (0.98-1.00) | 0.991 (0.979-0.996) | 0.99 (0.98-1.00) | 0.992 (0.980-0.997) |
| 0.5                                       | 4                               | 0.61 (0.44-0.75) | 0.60 (0.43-0.74) | 0.61 (0.44-0.75) | 0.607 (0.434-0.747) | 0.61 (0.44-0.75) | 0.607 (0.435-0.745) |
| 0.5                                       | 5                               | 0.58 (0.51-0.67) | 0.56 (0.49-0.66) | 0.57 (0.50-0.66) | 0.573 (0.500-0.663) | 0.57 (0.50-0.66) | 0.573 (0.501-0.663) |
| 0.6                                       | 1                               | 0.83 (0.82-0.84) | 1.00 (1.00-1.00) | 1.00 (1.00-1.00) | 0.799 (0.793-0.804) | 0.90 (0.89-0.90) | 0.915 (0.912-0.918) |
| 0.6                                       | 2                               | 0.82 (0.82-0.83) | 1.00 (1.00-1.00) | 1.00 (1.00-1.00) | 0.793 (0.785-0.800) | 0.89 (0.89-0.90) | 0.912 (0.908-0.916) |
| 0.6                                       | 3                               | 0.82 (0.81-0.83) | 1.00 (1.00-1.00) | 1.00 (1.00-1.00) | 0.788 (0.780-0.794) | 0.89 (0.89-0.90) | 0.910 (0.905-0.913) |
| 0.6                                       | 4                               | 0.56 (0.41-0.73) | 0.58 (0.35-0.84) | 0.67 (0.49-0.87) | 0.467 (0.287-0.673) | 0.57 (0.39-0.77) | 0.569 (0.383-0.783) |
| 0.6                                       | 5                               | 0.54 (0.48-0.62) | 0.54 (0.45-0.67) | 0.63 (0.56-0.74) | 0.436 (0.362-0.541) | 0.54 (0.46-0.64) | 0.537 (0.461-0.645) |
| 0.7                                       | 1                               | 0.71 (0.70-0.72) | 1.00 (1.00-1.00) | 1.00 (1.00-1.00) | 0.599 (0.592-0.605) | 0.80 (0.79-0.80) | 0.856 (0.852-0.860) |
| 0.7                                       | 2                               | 0.71 (0.70-0.71) | 1.00 (1.00-1.00) | 1.00 (1.00-1.00) | 0.594 (0.586-0.600) | 0.79 (0.79-0.80) | 0.853 (0.848-0.857) |
| 0.7                                       | 3                               | 0.70 (0.69-0.71) | 1.00 (1.00-1.00) | 1.00 (1.00-1.00) | 0.588 (0.582-0.596) | 0.79 (0.78-0.80) | 0.850 (0.846-0.854) |
| 0.7                                       | 4                               | 0.55 (0.42-0.70) | 0.60 (0.32-0.96) | 0.76 (0.59-0.98) | 0.360 (0.190-0.577) | 0.56 (0.39-0.78) | 0.572 (0.370-0.830) |
| 0.7                                       | 5                               | 0.51 (0.45-0.58) | 0.51 (0.36-0.66) | 0.71 (0.62-0.80) | 0.311 (0.219-0.402) | 0.51 (0.42-0.60) | 0.513 (0.405-0.620) |
| 0.8                                       | 1                               | 0.62 (0.62-0.63) | 1.00 (1.00-1.00) | 1.00 (1.00-1.00) | 0.399 (0.394-0.405) | 0.70 (0.69-0.71) | 0.812 (0.808-0.817) |
| 0.8                                       | 2                               | 0.62 (0.61-0.63) | 1.00 (1.00-1.00) | 1.00 (1.00-1.00) | 0.395 (0.390-0.400) | 0.69 (0.69-0.70) | 0.808 (0.805-0.813) |
| 0.8                                       | 3                               | 0.61 (0.60-0.62) | 1.00 (1.00-1.00) | 1.00 (1.00-1.00) | 0.391 (0.387-0.396) | 0.69 (0.68-0.70) | 0.805 (0.801-0.809) |
| 0.8                                       | 4                               | 0.53 (0.48-0.61) | 0.62 (0.42-0.92) | 0.85 (0.77-0.97) | 0.249 (0.167-0.368) | 0.55 (0.47-0.67) | 0.578 (0.449-0.764) |
| 0.8                                       | 5                               | 0.51 (0.46-0.57) | 0.52 (0.34-0.75) | 0.81 (0.73-0.90) | 0.209 (0.133-0.304) | 0.51 (0.43-0.61) | 0.515 (0.396-0.663) |
| 0.9                                       | 1                               | 0.55 (0.54-0.56) | 1.00 (1.00-1.00) | 1.00 (1.00-1.00) | 0.201 (0.198-0.204) | 0.60 (0.59-0.61) | 0.777 (0.772-0.781) |
| 0.9                                       | 2                               | 0.55 (0.54-0.55) | 1.00 (1.00-1.00) | 1.00 (1.00-1.00) | 0.198 (0.195-0.201) | 0.59 (0.58-0.60) | 0.774 (0.769-0.777) |
| 0.9                                       | 3                               | 0.54 (0.53-0.55) | 0.99 (0.97-1.00) | 1.00 (0.99-1.00) | 0.196 (0.191-0.199) | 0.59 (0.58-0.60) | 0.768 (0.754-0.774) |
| 0.9                                       | 4                               | 0.51 (0.48-0.54) | 0.60 (0.30-0.91) | 0.92 (0.86-0.98) | 0.122 (0.061-0.182) | 0.52 (0.46-0.58) | 0.558 (0.390-0.727) |
| 0.9                                       | 5                               | 0.51 (0.49-0.52) | 0.53 (0.36-0.69) | 0.91 (0.87-0.94  |                     |                  |                     |

**Supplementary Table S5: Impact of unevenly distributed but similarly prevalent resistance mechanisms in the training and test sets on signature performance.**

Analysis of the impact of multiple mechanisms of resistance leading to optimal (2.0-fold), weak (1.4-fold) or strong (2.8-fold) gene expression changes, where the resistance mechanisms displayed uneven frequencies but similar prevalence in training and test sets, on the predictive gene signature performance.

| Optimal gene expression changes (2.0-fold) |                                 |                  |                  |                  |                  |                  |                     |
|--------------------------------------------|---------------------------------|------------------|------------------|------------------|------------------|------------------|---------------------|
| Proportion of resistant cases              | Number of resistance mechanisms | Sensitivity      | Specificity      | PPV              | NPV              | Accuracy         | AUC                 |
| 0.5                                        | 2                               | 0.84 (0.67-1.00) | 1.00 (0.99-1.00) | 1.00 (0.99-1.00) | 0.87 (0.75-1.00) | 0.92 (0.83-1.00) | 0.961 (0.890-1.000) |
| 0.5                                        | 3                               | 0.78 (0.57-0.96) | 0.99 (0.97-1.00) | 0.99 (0.96-1.00) | 0.82 (0.70-0.96) | 0.89 (0.78-0.98) | 0.929 (0.852-0.991) |
| 0.5                                        | 4                               | 0.74 (0.55-0.88) | 0.98 (0.93-1.00) | 0.97 (0.92-1.00) | 0.79 (0.69-0.89) | 0.86 (0.77-0.94) | 0.903 (0.841-0.965) |
| 0.5                                        | 5                               | 0.71 (0.55-0.84) | 0.95 (0.89-1.00) | 0.94 (0.87-0.99) | 0.77 (0.68-0.86) | 0.83 (0.76-0.91) | 0.882 (0.817-0.945) |
| 0.6                                        | 2                               | 0.83 (0.66-0.99) | 1.00 (0.99-1.00) | 1.00 (0.99-1.00) | 0.81 (0.66-0.99) | 0.90 (0.80-0.99) | 0.956 (0.885-1.000) |
| 0.6                                        | 3                               | 0.78 (0.58-0.96) | 0.99 (0.97-1.00) | 0.99 (0.97-1.00) | 0.76 (0.61-0.95) | 0.86 (0.75-0.98) | 0.928 (0.848-0.991) |
| 0.6                                        | 4                               | 0.73 (0.54-0.90) | 0.97 (0.92-1.00) | 0.98 (0.94-1.00) | 0.71 (0.58-0.87) | 0.83 (0.71-0.93) | 0.900 (0.815-0.966) |
| 0.6                                        | 5                               | 0.72 (0.52-0.85) | 0.94 (0.88-0.99) | 0.95 (0.90-0.99) | 0.70 (0.57-0.80) | 0.81 (0.70-0.90) | 0.882 (0.813-0.944) |
| 0.7                                        | 2                               | 0.84 (0.66-0.99) | 1.00 (0.99-1.00) | 1.00 (0.99-1.00) | 0.76 (0.56-0.99) | 0.89 (0.76-1.00) | 0.957 (0.885-1.000) |
| 0.7                                        | 3                               | 0.77 (0.57-0.97) | 0.99 (0.95-1.00) | 0.99 (0.97-1.00) | 0.66 (0.49-0.93) | 0.83 (0.69-0.97) | 0.923 (0.837-0.991) |
| 0.7                                        | 4                               | 0.75 (0.54-0.92) | 0.96 (0.90-1.00) | 0.98 (0.95-1.00) | 0.63 (0.48-0.85) | 0.81 (0.68-0.94) | 0.902 (0.821-0.974) |
| 0.7                                        | 5                               | 0.73 (0.52-0.87) | 0.94 (0.85-0.99) | 0.96 (0.92-1.00) | 0.60 (0.46-0.75) | 0.79 (0.65-0.89) | 0.880 (0.801-0.944) |
| 0.8                                        | 2                               | 0.85 (0.67-1.00) | 1.00 (0.99-1.00) | 1.00 (1.00-1.00) | 0.67 (0.43-0.98) | 0.88 (0.74-1.00) | 0.959 (0.888-1.000) |
| 0.8                                        | 3                               | 0.77 (0.59-0.96) | 0.98 (0.93-1.00) | 0.99 (0.98-1.00) | 0.55 (0.37-0.87) | 0.82 (0.67-0.97) | 0.925 (0.844-0.990) |
| 0.8                                        | 4                               | 0.75 (0.58-0.92) | 0.95 (0.87-1.00) | 0.99 (0.96-1.00) | 0.51 (0.37-0.75) | 0.79 (0.66-0.92) | 0.900 (0.827-0.975) |
| 0.8                                        | 5                               | 0.74 (0.57-0.89) | 0.91 (0.79-0.99) | 0.97 (0.94-1.00) | 0.48 (0.36-0.66) | 0.77 (0.65-0.89) | 0.878 (0.819-0.940) |
| 0.9                                        | 2                               | 0.85 (0.68-0.99) | 1.00 (0.98-1.00) | 1.00 (1.00-1.00) | 0.52 (0.26-0.95) | 0.86 (0.71-0.99) | 0.958 (0.895-1.000) |
| 0.9                                        | 3                               | 0.79 (0.62-0.97) | 0.97 (0.88-1.00) | 1.00 (0.99-1.00) | 0.39 (0.22-0.76) | 0.81 (0.65-0.96) | 0.925 (0.851-0.990) |
| 0.9                                        | 4                               | 0.77 (0.57-0.93) | 0.90 (0.75-1.00) | 0.99 (0.97-1.00) | 0.34 (0.20-0.60) | 0.79 (0.61-0.93) | 0.898 (0.821-0.965) |
| 0.9                                        | 5                               | 0.78 (0.56-0.91) | 0.82 (0.62-0.98) | 0.98 (0.95-1.00) | 0.31 (0.19-0.48) | 0.78 (0.60-0.89) | 0.872 (0.800-0.935) |
| 0.95                                       | 2                               | 0.85 (0.70-1.00) | 0.99 (0.96-1.00) | 1.00 (1.00-1.00) | 0.39 (0.15-0.93) | 0.86 (0.71-1.00) | 0.958 (0.897-1.000) |
| 0.95                                       | 3                               | 0.83 (0.64-0.97) | 0.89 (0.64-1.00) | 0.99 (0.98-1.00) | 0.26 (0.12-0.63) | 0.83 (0.66-0.97) | 0.917 (0.843-0.986) |
| 0.95                                       | 4                               | 0.83 (0.63-0.93) | 0.69 (0.38-1.00) | 0.98 (0.96-1.00) | 0.19 (0.12-0.35) | 0.82 (0.65-0.92) | 0.863 (0.778-0.951) |
| 0.95                                       | 5                               | 0.85 (0.69-0.93) | 0.49 (0.23-0.89) | 0.97 (0.96-0.99) | 0.15 (0.10-0.26) | 0.83 (0.70-0.90) | 0.802 (0.690-0.899) |

| Weak gene expression changes (1.4-fold) |                                 |                  |                  |                  |                    |                  |                     |
|-----------------------------------------|---------------------------------|------------------|------------------|------------------|--------------------|------------------|---------------------|
| Proportion of resistant cases           | Number of resistance mechanisms | Sensitivity      | Specificity      | PPV              | NPV                | Accuracy         | AUC                 |
| 0.5                                     | 2                               | 0.83 (0.72-0.96) | 0.95 (0.89-1.00) | 0.94 (0.88-1.00) | 0.851 (0.776-0.96) | 0.89 (0.83-0.97) | 0.937 (0.891-0.986) |
| 0.5                                     | 3                               | 0.76 (0.64-0.90) | 0.89 (0.80-0.98) | 0.88 (0.79-0.97) | 0.791 (0.718-0.91) | 0.83 (0.76-0.92) | 0.886 (0.831-0.955) |
| 0.5                                     | 4                               | 0.73 (0.63-0.83) | 0.83 (0.74-0.94) | 0.82 (0.73-0.92) | 0.754 (0.694-0.83) | 0.78 (0.72-0.86) | 0.844 (0.783-0.911) |
| 0.5                                     | 5                               | 0.70 (0.61-0.78) | 0.78 (0.68-0.90) | 0.76 (0.68-0.88) | 0.721 (0.662-0.80) | 0.74 (0.67-0.82) | 0.803 (0.733-0.884) |
| 0.6                                     | 2                               | 0.85 (0.74-0.96) | 0.94 (0.88-1.00) | 0.96 (0.91-1.00) | 0.815 (0.705-0.95) | 0.89 (0.82-0.97) | 0.942 (0.893-0.985) |
| 0.6                                     | 3                               | 0.78 (0.66-0.91) | 0.88 (0.78-0.97) | 0.91 (0.84-0.98) | 0.733 (0.639-0.87) | 0.82 (0.75-0.91) | 0.891 (0.832-0.960) |
| 0.6                                     | 4                               | 0.75 (0.63-0.83) | 0.81 (0.71-0.92) | 0.86 (0.80-0.93) | 0.685 (0.610-0.77) | 0.77 (0.72-0.84) | 0.848 (0.791-0.904) |
| 0.6                                     | 5                               | 0.73 (0.64-0.79) | 0.74 (0.63-0.88) | 0.81 (0.74-0.90) | 0.646 (0.578-0.72) | 0.73 (0.67-0.80) | 0.805 (0.740-0.874) |
| 0.7                                     | 2                               | 0.85 (0.75-0.94) | 0.93 (0.85-0.99) | 0.97 (0.93-1.00) | 0.733 (0.614-0.88) | 0.87 (0.81-0.95) | 0.938 (0.893-0.979) |
| 0.7                                     | 3                               | 0.79 (0.68-0.90) | 0.85 (0.74-0.96) | 0.93 (0.88-0.98) | 0.645 (0.543-0.80) | 0.81 (0.74-0.90) | 0.887 (0.835-0.952) |
| 0.7                                     | 4                               | 0.77 (0.66-0.85) | 0.76 (0.63-0.91) | 0.88 (0.83-0.95) | 0.586 (0.498-0.70) | 0.76 (0.70-0.85) | 0.838 (0.772-0.919) |
| 0.7                                     | 5                               | 0.74 (0.65-0.80) | 0.68 (0.56-0.85) | 0.85 (0.79-0.92) | 0.534 (0.466-0.63) | 0.73 (0.67-0.79) | 0.788 (0.708-0.867) |
| 0.8                                     | 2                               | 0.86 (0.76-0.96) | 0.91 (0.82-0.99) | 0.98 (0.95-1.00) | 0.632 (0.492-0.86) | 0.87 (0.79-0.97) | 0.936 (0.891-0.986) |
| 0.8                                     | 3                               | 0.81 (0.70-0.90) | 0.80 (0.66-0.96) | 0.94 (0.91-0.99) | 0.525 (0.409-0.70) | 0.81 (0.73-0.90) | 0.881 (0.827-0.952) |
| 0.8                                     | 4                               | 0.79 (0.69-0.86) | 0.68 (0.51-0.90) | 0.91 (0.87-0.97) | 0.451 (0.369-0.59) | 0.77 (0.71-0.84) | 0.821 (0.738-0.904) |
| 0.8                                     | 5                               | 0.78 (0.70-0.84) | 0.57 (0.42-0.78) | 0.88 (0.84-0.93) | 0.392 (0.314-0.52) | 0.74 (0.68-0.81) | 0.760 (0.653-0.859) |
| 0.9                                     | 2                               | 0.87 (0.78-0.97) | 0.83 (0.65-0.98) | 0.98 (0.96-1.00) | 0.454 (0.303-0.74) | 0.87 (0.79-0.95) | 0.922 (0.872-0.979) |
| 0.9                                     | 3                               | 0.84 (0.75-0.92) | 0.61 (0.38-0.94) | 0.95 (0.93-0.99) | 0.304 (0.213-0.51) | 0.81 (0.75-0.90) | 0.828 (0.709-0.929) |
| 0.9                                     | 4                               | 0.83 (0.74-0.89) | 0.47 (0.27-0.83) | 0.93 (0.91-0.98) | 0.232 (0.152-0.38) | 0.79 (0.74-0.86) | 0.748 (0.619-0.890) |
| 0.9                                     | 5                               | 0.82 (0.75-0.88) | 0.36 (0.22-0.60) | 0.92 (0.91-0.95) | 0.183 (0.127-0.25) | 0.78 (0.73-0.82) | 0.673 (0.570-0.801) |
| 0.95                                    | 2                               | 0.89 (0.84-0.96) | 0.56 (0.27-0.96) | 0.97 (0.96-1.00) | 0.222 (0.134-0.52) | 0.87 (0.82-0.95) | 0.853 (0.739-0.979) |
| 0.95                                    | 3                               | 0.88 (0.82-0.93) | 0.33 (0.15-0.69) | 0.96 (0.95-0.98) | 0.124 (0.071-0.25) | 0.85 (0.80-0.90) | 0.717 (0.587-0.906) |
| 0.95                                    | 4                               | 0.87 (0.81-0.92) | 0.24 (0.12-0.46) | 0.96 (0.95-0.97) | 0.088 (0.050-0.16) | 0.84 (0.79-0.88) | 0.633 (0.534-0.799) |
| 0.95                                    | 5                               | 0.86 (0.80-0.91) | 0.20 (0.10-0.35) | 0.95 (0.95-0.96) | 0.069 (0.044-0.11) | 0.83 (0.77-0.87) | 0.579 (0.491-0.749) |

| Strong gene expression changes (2.8-fold) |                                 |                  |               |               |                  |                  |                     |
|-------------------------------------------|---------------------------------|------------------|---------------|---------------|------------------|------------------|---------------------|
| Proportion of resistant cases             | Number of resistance mechanisms | Sensitivity      | Specificity   | PPV           | NPV              | Accuracy         | AUC                 |
| 0.5                                       | 2                               | 0.83 (0.63-1.00) | 1.00 (1.00-1) | 1.00 (1.00-1) | 0.86 (0.73-1.00) | 0.91 (0.82-1.00) | 0.959 (0.884-1.000) |
| 0.5                                       | 3                               | 0.76 (0.54-0.98) | 1.00 (1.00-1) | 1.00 (1.00-1) | 0.81 (0.68-0.98) | 0.88 (0.77-0.99) | 0.931 (0.840-0.999) |
| 0.5                                       | 4                               | 0.72 (0.48-0.93) | 1.00 (0.98-1) | 1.00 (0.98-1) | 0.79 (0.66-0.94) | 0.86 (0.74-0.96) | 0.907 (0.823-0.983) |
| 0.5                                       | 5                               | 0.69 (0.46-0.86) | 0.99 (0.97-1) | 0.99 (0.96-1) | 0.77 (0.65-0.87) | 0.84 (0.73-0.92) | 0.889 (0.810-0.969) |
| 0.6                                       | 2                               | 0.82 (0.63-1.00) | 1.00 (1.00-1) | 1.00 (1.00-1) | 0.81 (0.64-1.00) | 0.89 (0.78-1.00) | 0.953 (0.875-1.000) |
| 0.6                                       | 3                               | 0.73 (0.53-0.98) | 1.00 (1.00-1) | 1.00 (1.00-1) | 0.73 (0.58-0.97) | 0.84 (0.72-0.99) | 0.923 (0.834-0.998) |
| 0.6                                       | 4                               | 0.70 (0.47-0.93) | 1.00 (0.99-1) | 1.00 (0.99-1) | 0.70 (0.56-0.90) | 0.82 (0.68-0.96) | 0.901 (0.807-0.978) |
| 0.6                                       | 5                               | 0.68 (0.50-0.86) | 0.99 (0.96-1) | 0.99 (0.97-1) | 0.68 (0.57-0.82) | 0.80 (0.70-0.91) | 0.881 (0.805-0.961) |
| 0.7                                       | 2                               | 0.82 (0.62-1.00) | 1.00 (1.00-1) | 1.00 (1.00-1) | 0.74 (0.53-1.00) | 0.87 (0.74-1.00) | 0.950 (0.866-1.000) |
| 0.7                                       | 3                               | 0.75 (0.54-0.97) | 1.00 (0.99-1) | 1.00 (1.00-1) | 0.65 (0.48-0.93) | 0.82 (0.68-0.98) | 0.922 (0.827-0.994) |
| 0.7                                       | 4                               | 0.71 (0.50-0.89) | 1.00 (0.98-1) | 1.00 (0.99-1) | 0.61 (0.46-0.79) | 0.79 (0.65-0.92) | 0.902 (0.819-0.978) |
| 0.7                                       | 5                               | 0.68 (0.48-0.86) | 0.99 (0.94-1) | 0.99 (0.97-1) | 0.58 (0.45-0.76) | 0.77 (0.64-0.89) | 0.881 (0.798-0.954) |
| 0.8                                       | 2                               | 0.82 (0.62-1.00) | 1.00 (1.00-1) | 1.00 (1.00-1) | 0.64 (0.40-1.00) | 0.85 (0.70-1.00) | 0.953 (0.868-1.000) |
| 0.8                                       | 3                               | 0.75 (0.52-0.97) | 1.00 (0.99-1) | 1.00 (1.00-1) | 0.53 (0.35-0.91) | 0.80 (0.62-0.98) | 0.922 (0.831-0.998) |
| 0.8                                       | 4                               | 0.71 (0.49-0.92) | 0.99 (0.96-1) | 1.00 (0.99-1) | 0.48 (0.33-0.76) | 0.77 (0.59-0.93) | 0.900 (0.821-0.980) |
| 0.8                                       | 5                               | 0.69 (0.47-0.87) | 0.98 (0.92-1) | 0.99 (0.97-1) | 0.46 (0.32-0.66) | 0.75 (0.57-0.89) | 0.883 (0.805-0.954) |
| 0.9                                       | 2                               | 0.81 (0.63-1.00) | 1.00 (1.00-1) | 1.00 (1.00-1) | 0.49 (0.23-1.00) | 0.83 (0.67-1.00) | 0.948 (0.865-1.000) |
| 0.9                                       | 3                               | 0.76 (0.53-0.98) | 1.00 (0.96-1) | 1.00 (1.00-1) | 0.37 (0.19-0.85) | 0.78 (0.58-0.98) | 0.922 (0.827-0.997) |
| 0.9                                       | 4                               | 0.72 (0.51-0.95) | 0.99 (0.90-1) | 1.00 (0.99-1) | 0.32 (0.18-0.67) | 0.75 (0.55-0.95) | 0.902 (0.823-0.984) |
| 0.9                                       | 5                               | 0.73 (0.50-0.89) | 0.96 (0.84-1) | 0.99 (0.98-1) | 0.30 (0.18-0.49) | 0.75 (0.55-0.90) | 0.890 (0.811-0.956) |
| 0.95                                      | 2                               | 0.82 (0.64-1.00) | 1.00 (1.00-1) | 1.00 (1.00-1) | 0.36 (0.13-1.00) | 0.83 (0.66-1.00) | 0.956 (0.878-1.000) |
| 0.95                                      | 3                               | 0.76 (0.56-0.98) | 0.99 (0.92-1) | 1.00 (1.00-1) | 0.24 (0.11-0.72) | 0.78 (0.58-0.98) | 0.928 (0.841-0.995) |
| 0.95                                      | 4                               | 0.77 (0.54-0.95) | 0.93 (0.69-1) | 1.00 (0.98-1) | 0.20 (0.10-0.45) | 0.77 (0.56-0.94) | 0.904 (0.829-0.976) |
| 0.95                                      | 5                               | 0.78 (0.53-0.94) | 0.80 (0.42-1) | 0.99 (0.97-1) | 0.18 (0.10-0.35) | 0.78 (0.55-0.92) | 0.871 (0.787-0.950) |

| Trend tests                   |                     |                     |                     |                     |         |  |
|-------------------------------|---------------------|---------------------|---------------------|---------------------|---------|--|
| Optimal signature (2-fold)    |                     |                     |                     |                     |         |  |
| Proportion of resistant cases | 2                   | 3                   | 4                   | 5                   | p-value |  |
| 0.5*                          | 0.961 (0.890-1.000) | 0.929 (0.852-0.991) | 0.903 (0.841-0.965) | 0.882 (0.817-0.945) | > 0.05  |  |
| 0.6                           | 0.956 (0.885-1.000) | 0.928 (0.848-0.991) | 0.900 (0.815-0.966) | 0.882 (0.813-0.944) | > 0.05  |  |
| 0.7                           | 0.957 (0.885-1.000) | 0.923 (0.837-0.991) | 0.902 (0.821-0.974) | 0.880 (0.801-0.944) | > 0.05  |  |
| 0.8                           | 0.959 (0.888-1.000) | 0.925 (0.844-0.990) | 0.900 (0.827-0.975) | 0.878 (0.819-0.940) | > 0.05  |  |
| 0.9**                         | 0.958 (0.895-1.000) | 0.925 (0.851-0.990) | 0.898 (0.821-0.965) | 0.872 (0.800-0.935) | > 0.05  |  |
| 0.95                          | 0.958 (0.897-1.000) | 0.917 (0.843-0.986) | 0.863 (0.778-0.951) | 0.802 (0.690-0.899) | > 0.05  |  |
| Weak signature (1.4-fold)     |                     |                     |                     |                     |         |  |
| Proportion of resistant cases | 2                   | 3                   | 4                   | 5                   | p-value |  |
| 0.5*                          | 0.937 (0.891-0.986) | 0.886 (0.831-0.955) | 0.844 (0.783-0.911) | 0.803 (0.733-0.884) | 0.01    |  |
| 0.6                           | 0.942 (0.893-0.985) | 0.891 (0.832-0.960) | 0.848 (0.791-0.904) | 0.805 (0.740-0.874) | 0.005   |  |
| 0.7                           | 0.938 (0.893-0.979) | 0.887 (0.835-0.952) | 0.838 (0.772-0.919) | 0.788 (0.708-0.867) | 0.002   |  |
| 0.8                           | 0.936 (0.891-0.986) | 0.881 (0.827-0.952) | 0.821 (0.738-0.904) | 0.760 (0.653-0.859) | 0.003   |  |
| 0.9**                         | 0.922 (0.872-0.979) | 0.828 (0.709-0.929) | 0.748 (0.619-0.890) | 0.673 (0.570-0.801) | 0.0008  |  |
| 0.95                          | 0.853 (0.739-0.979) | 0.717 (0.587-0.906) | 0.633 (0.534-0.799) | 0.579 (0.491-0.749) | 0.04    |  |
| Strong signature (2.8-fold)   |                     |                     |                     |                     |         |  |
| Proportion of resistant cases | 2                   | 3                   | 4                   | 5                   | p-value |  |
| 0.5*                          | 0.959 (0.884-1.000) | 0.931 (0.840-0.999) | 0.907 (0.823-0.983) | 0.889 (0.810-0.969) | > 0.05  |  |
| 0.6                           | 0.953 (0.875-1.000) | 0.923 (0.834-0.998) | 0.901 (0.807-0.978) | 0.881 (0.805-0.961) | > 0.05  |  |
| 0.7                           | 0.950 (0.866-1.000) | 0.922 (0.827-0.994) | 0.902 (0.819-0.978) | 0.881 (0.798-0.954) | > 0.05  |  |
| 0.8                           | 0.953 (0.868        |                     |                     |                     |         |  |

**Supplementary Table S6: Impact of different distributions of resistance mechanisms in training and test sets on signature performance.**

Analysis of the impact of random and independent proportions of resistance mechanisms in training and test sets, where the gene expression changes are optimal (2-fold), weak (1.4-fold) or strong (2.8-fold) and the prevalence of resistant cases is identical in training and test sets, on the performance of the predictive gene signatures tested.

| Optimal gene expression changes (2-fold) |                                 |                   |                  |                  |                   |                  |                     |
|------------------------------------------|---------------------------------|-------------------|------------------|------------------|-------------------|------------------|---------------------|
| Proportion of resistant cases            | Number of resistance mechanisms | Sensitivity       | Specificity      | PPV              | NPV               | Accuracy         | AUC                 |
| 0.5                                      | 2                               | 0.66 (0.131-0.99) | 1.00 (0.99-1.00) | 1.00 (0.99-1.00) | 0.78 (0.534-0.99) | 0.83 (0.56-1.00) | 0.895 (0.653-1.000) |
| 0.5                                      | 3                               | 0.56 (0.104-0.95) | 0.99 (0.97-1.00) | 0.99 (0.94-1.00) | 0.71 (0.527-0.95) | 0.77 (0.55-0.97) | 0.835 (0.629-0.993) |
| 0.5                                      | 4                               | 0.50 (0.151-0.88) | 0.98 (0.93-1.00) | 0.95 (0.87-1.00) | 0.67 (0.537-0.89) | 0.74 (0.57-0.93) | 0.791 (0.609-0.968) |
| 0.5                                      | 5                               | 0.48 (0.138-0.81) | 0.96 (0.90-0.99) | 0.92 (0.81-0.98) | 0.66 (0.532-0.83) | 0.72 (0.56-0.88) | 0.767 (0.589-0.927) |
| 0.6                                      | 2                               | 0.69 (0.161-0.99) | 1.00 (0.99-1.00) | 1.00 (0.99-1.00) | 0.73 (0.443-0.99) | 0.81 (0.50-1.00) | 0.918 (0.633-1.000) |
| 0.6                                      | 3                               | 0.58 (0.151-0.97) | 0.99 (0.96-1.00) | 0.99 (0.95-1.00) | 0.64 (0.439-0.95) | 0.74 (0.49-0.97) | 0.844 (0.622-0.993) |
| 0.6                                      | 4                               | 0.52 (0.109-0.88) | 0.97 (0.92-1.00) | 0.97 (0.91-1.00) | 0.60 (0.421-0.84) | 0.70 (0.45-0.91) | 0.797 (0.594-0.963) |
| 0.6                                      | 5                               | 0.51 (0.193-0.81) | 0.95 (0.87-1.00) | 0.93 (0.87-0.99) | 0.58 (0.443-0.76) | 0.68 (0.50-0.85) | 0.780 (0.635-0.920) |
| 0.7                                      | 2                               | 0.64 (0.068-0.99) | 1.00 (0.99-1.00) | 1.00 (0.99-1.00) | 0.62 (0.316-0.98) | 0.75 (0.35-0.99) | 0.876 (0.562-1.000) |
| 0.7                                      | 3                               | 0.54 (0.129-0.96) | 0.99 (0.96-1.00) | 0.99 (0.97-1.00) | 0.52 (0.330-0.92) | 0.68 (0.39-0.96) | 0.824 (0.617-0.992) |
| 0.7                                      | 4                               | 0.53 (0.175-0.89) | 0.96 (0.90-1.00) | 0.97 (0.93-1.00) | 0.49 (0.338-0.78) | 0.66 (0.42-0.90) | 0.799 (0.613-0.950) |
| 0.7                                      | 5                               | 0.54 (0.153-0.86) | 0.93 (0.83-0.99) | 0.95 (0.89-0.99) | 0.48 (0.327-0.72) | 0.65 (0.39-0.86) | 0.784 (0.596-0.930) |
| 0.8                                      | 2                               | 0.66 (0.099-1.00) | 1.00 (0.99-1.00) | 1.00 (0.99-1.00) | 0.53 (0.217-0.98) | 0.73 (0.28-1.00) | 0.898 (0.640-1.000) |
| 0.8                                      | 3                               | 0.59 (0.096-0.96) | 0.98 (0.94-1.00) | 0.99 (0.98-1.00) | 0.43 (0.216-0.87) | 0.67 (0.28-0.96) | 0.843 (0.617-0.990) |
| 0.8                                      | 4                               | 0.53 (0.097-0.88) | 0.95 (0.87-1.00) | 0.98 (0.95-1.00) | 0.37 (0.214-0.66) | 0.62 (0.28-0.89) | 0.791 (0.597-0.953) |
| 0.8                                      | 5                               | 0.54 (0.169-0.84) | 0.91 (0.79-0.99) | 0.96 (0.92-1.00) | 0.35 (0.229-0.58) | 0.62 (0.33-0.85) | 0.777 (0.604-0.914) |
| 0.9                                      | 2                               | 0.68 (0.107-1.00) | 1.00 (0.98-1.00) | 1.00 (1.00-1.00) | 0.43 (0.111-0.97) | 0.71 (0.20-1.00) | 0.891 (0.618-1.000) |
| 0.9                                      | 3                               | 0.65 (0.198-0.98) | 0.97 (0.87-1.00) | 0.99 (0.98-1.00) | 0.32 (0.119-0.85) | 0.68 (0.28-0.98) | 0.853 (0.629-0.992) |
| 0.9                                      | 4                               | 0.60 (0.202-0.93) | 0.91 (0.75-1.00) | 0.98 (0.96-1.00) | 0.25 (0.122-0.59) | 0.63 (0.28-0.93) | 0.807 (0.619-0.962) |
| 0.9                                      | 5                               | 0.61 (0.223-0.88) | 0.81 (0.62-0.98) | 0.97 (0.94-1.00) | 0.21 (0.122-0.39) | 0.63 (0.29-0.86) | 0.770 (0.620-0.899) |
| 0.95                                     | 2                               | 0.68 (0.088-1.00) | 0.99 (0.96-1.00) | 1.00 (1.00-1.00) | 0.30 (0.055-0.93) | 0.70 (0.13-1.00) | 0.888 (0.582-1.000) |
| 0.95                                     | 3                               | 0.65 (0.140-0.96) | 0.89 (0.65-1.00) | 0.99 (0.98-1.00) | 0.18 (0.058-0.53) | 0.66 (0.18-0.95) | 0.832 (0.592-0.976) |
| 0.95                                     | 4                               | 0.69 (0.252-0.94) | 0.67 (0.35-0.98) | 0.98 (0.96-1.00) | 0.13 (0.058-0.33) | 0.69 (0.29-0.92) | 0.765 (0.572-0.929) |
| 0.95                                     | 5                               | 0.75 (0.297-0.90) | 0.47 (0.23-0.92) | 0.97 (0.95-0.99) | 0.10 (0.058-0.15) | 0.74 (0.32-0.87) | 0.705 (0.580-0.819) |

| Weak gene expression changes (1.4-fold) |                                 |                  |                   |                  |                     |                  |                     |
|-----------------------------------------|---------------------------------|------------------|-------------------|------------------|---------------------|------------------|---------------------|
| Proportion of resistant cases           | Number of resistance mechanisms | Sensitivity      | Specificity       | PPV              | NPV                 | Accuracy         | AUC                 |
| 0.5                                     | 2                               | 0.65 (0.10-0.93) | 0.95 (0.895-1.00) | 0.92 (0.76-0.99) | 0.754 (0.521-0.931) | 0.80 (0.54-0.93) | 0.856 (0.539-0.982) |
| 0.5                                     | 3                               | 0.59 (0.21-0.85) | 0.90 (0.820-0.98) | 0.85 (0.73-0.96) | 0.697 (0.546-0.857) | 0.74 (0.58-0.87) | 0.798 (0.599-0.931) |
| 0.5                                     | 4                               | 0.55 (0.24-0.78) | 0.84 (0.738-0.95) | 0.78 (0.68-0.89) | 0.660 (0.552-0.783) | 0.70 (0.59-0.80) | 0.749 (0.594-0.869) |
| 0.5                                     | 5                               | 0.54 (0.21-0.75) | 0.79 (0.663-0.91) | 0.72 (0.64-0.81) | 0.638 (0.531-0.750) | 0.66 (0.55-0.75) | 0.713 (0.579-0.821) |
| 0.6                                     | 2                               | 0.71 (0.19-0.95) | 0.94 (0.891-1.00) | 0.94 (0.85-0.99) | 0.720 (0.437-0.927) | 0.80 (0.49-0.94) | 0.880 (0.630-0.985) |
| 0.6                                     | 3                               | 0.63 (0.22-0.88) | 0.88 (0.777-0.97) | 0.88 (0.78-0.96) | 0.634 (0.443-0.841) | 0.73 (0.51-0.88) | 0.809 (0.612-0.940) |
| 0.6                                     | 4                               | 0.59 (0.25-0.83) | 0.80 (0.708-0.92) | 0.82 (0.74-0.89) | 0.579 (0.444-0.751) | 0.67 (0.51-0.80) | 0.752 (0.591-0.873) |
| 0.6                                     | 5                               | 0.59 (0.35-0.79) | 0.74 (0.638-0.88) | 0.77 (0.70-0.86) | 0.554 (0.448-0.686) | 0.65 (0.53-0.76) | 0.717 (0.603-0.833) |
| 0.7                                     | 2                               | 0.70 (0.27-0.95) | 0.93 (0.852-0.99) | 0.96 (0.92-0.99) | 0.620 (0.361-0.887) | 0.77 (0.47-0.94) | 0.872 (0.668-0.981) |
| 0.7                                     | 3                               | 0.66 (0.21-0.90) | 0.84 (0.735-0.97) | 0.91 (0.85-0.97) | 0.545 (0.349-0.779) | 0.71 (0.44-0.88) | 0.812 (0.611-0.939) |
| 0.7                                     | 4                               | 0.62 (0.28-0.85) | 0.76 (0.632-0.92) | 0.86 (0.80-0.92) | 0.477 (0.334-0.671) | 0.66 (0.44-0.81) | 0.747 (0.590-0.881) |
| 0.7                                     | 5                               | 0.62 (0.38-0.76) | 0.68 (0.548-0.87) | 0.82 (0.77-0.88) | 0.441 (0.349-0.545) | 0.64 (0.51-0.73) | 0.704 (0.607-0.795) |
| 0.8                                     | 2                               | 0.70 (0.19-0.96) | 0.92 (0.830-0.99) | 0.97 (0.93-1.00) | 0.511 (0.230-0.854) | 0.74 (0.34-0.95) | 0.863 (0.588-0.984) |
| 0.8                                     | 3                               | 0.66 (0.27-0.90) | 0.80 (0.641-0.96) | 0.93 (0.90-0.98) | 0.409 (0.239-0.674) | 0.69 (0.40-0.88) | 0.794 (0.635-0.925) |
| 0.8                                     | 4                               | 0.66 (0.39-0.86) | 0.67 (0.509-0.86) | 0.89 (0.85-0.94) | 0.349 (0.241-0.508) | 0.66 (0.46-0.80) | 0.733 (0.597-0.853) |
| 0.8                                     | 5                               | 0.67 (0.39-0.81) | 0.56 (0.417-0.78) | 0.86 (0.83-0.91) | 0.308 (0.225-0.400) | 0.65 (0.45-0.75) | 0.676 (0.558-0.789) |
| 0.9                                     | 2                               | 0.72 (0.21-0.97) | 0.83 (0.683-0.98) | 0.97 (0.96-1.00) | 0.353 (0.119-0.737) | 0.73 (0.28-0.95) | 0.846 (0.601-0.979) |
| 0.9                                     | 3                               | 0.71 (0.41-0.93) | 0.62 (0.404-0.89) | 0.94 (0.92-0.97) | 0.220 (0.127-0.484) | 0.70 (0.44-0.89) | 0.742 (0.606-0.899) |
| 0.9                                     | 4                               | 0.74 (0.50-0.88) | 0.44 (0.279-0.71) | 0.92 (0.91-0.95) | 0.167 (0.115-0.259) | 0.71 (0.52-0.82) | 0.662 (0.555-0.784) |
| 0.9                                     | 5                               | 0.77 (0.64-0.85) | 0.34 (0.212-0.52) | 0.91 (0.90-0.93) | 0.141 (0.107-0.188) | 0.72 (0.62-0.79) | 0.605 (0.535-0.688) |
| 0.95                                    | 2                               | 0.77 (0.34-0.97) | 0.56 (0.308-0.94) | 0.97 (0.96-1.00) | 0.168 (0.061-0.438) | 0.76 (0.37-0.94) | 0.773 (0.578-0.934) |
| 0.95                                    | 3                               | 0.81 (0.46-0.91) | 0.33 (0.154-0.69) | 0.96 (0.95-0.97) | 0.089 (0.057-0.157) | 0.78 (0.48-0.88) | 0.651 (0.542-0.788) |
| 0.95                                    | 4                               | 0.83 (0.63-0.90) | 0.25 (0.115-0.54) | 0.95 (0.95-0.96) | 0.071 (0.043-0.100) | 0.80 (0.63-0.86) | 0.591 (0.497-0.704) |
| 0.95                                    | 5                               | 0.84 (0.77-0.89) | 0.20 (0.077-0.35) | 0.95 (0.95-0.96) | 0.062 (0.040-0.086) | 0.81 (0.74-0.85) | 0.556 (0.487-0.625) |

| Strong gene expression changes (2.8-fold) |                                 |                   |               |               |                   |                  |                     |
|-------------------------------------------|---------------------------------|-------------------|---------------|---------------|-------------------|------------------|---------------------|
| Proportion of resistant cases             | Number of resistance mechanisms | Sensitivity       | Specificity   | PPV           | NPV               | Accuracy         | AUC                 |
| 0.5                                       | 2                               | 0.65 (0.064-1.00) | 1.00 (1.00-1) | 1.00 (1.00-1) | 0.77 (0.516-1.00) | 0.83 (0.53-1.00) | 0.897 (0.601-1.000) |
| 0.5                                       | 3                               | 0.55 (0.081-0.97) | 1.00 (1.00-1) | 1.00 (1.00-1) | 0.71 (0.520-0.97) | 0.77 (0.54-0.98) | 0.849 (0.637-0.997) |
| 0.5                                       | 4                               | 0.49 (0.089-0.87) | 1.00 (0.99-1) | 1.00 (0.98-1) | 0.67 (0.523-0.88) | 0.74 (0.54-0.93) | 0.800 (0.626-0.966) |
| 0.5                                       | 5                               | 0.45 (0.070-0.77) | 0.99 (0.97-1) | 0.99 (0.95-1) | 0.65 (0.518-0.81) | 0.72 (0.53-0.88) | 0.780 (0.584-0.937) |
| 0.6                                       | 2                               | 0.60 (0.128-1.00) | 1.00 (1.00-1) | 1.00 (1.00-1) | 0.67 (0.434-1.00) | 0.76 (0.48-1.00) | 0.863 (0.601-1.000) |
| 0.6                                       | 3                               | 0.52 (0.080-0.92) | 1.00 (1.00-1) | 1.00 (1.00-1) | 0.61 (0.420-0.90) | 0.71 (0.45-0.95) | 0.823 (0.595-0.991) |
| 0.6                                       | 4                               | 0.49 (0.109-0.86) | 1.00 (0.99-1) | 1.00 (0.98-1) | 0.59 (0.428-0.83) | 0.69 (0.47-0.92) | 0.808 (0.626-0.982) |
| 0.6                                       | 5                               | 0.44 (0.097-0.82) | 0.99 (0.97-1) | 0.99 (0.96-1) | 0.55 (0.424-0.79) | 0.66 (0.46-0.89) | 0.773 (0.608-0.938) |
| 0.7                                       | 2                               | 0.65 (0.138-1.00) | 1.00 (1.00-1) | 1.00 (1.00-1) | 0.62 (0.333-1.00) | 0.75 (0.40-1.00) | 0.881 (0.630-1.000) |
| 0.7                                       | 3                               | 0.50 (0.080-0.94) | 1.00 (0.99-1) | 1.00 (0.99-1) | 0.50 (0.318-0.88) | 0.65 (0.36-0.96) | 0.813 (0.572-0.993) |
| 0.7                                       | 4                               | 0.45 (0.104-0.86) | 1.00 (0.97-1) | 1.00 (0.98-1) | 0.46 (0.324-0.75) | 0.62 (0.37-0.90) | 0.785 (0.603-0.976) |
| 0.7                                       | 5                               | 0.46 (0.149-0.74) | 0.99 (0.95-1) | 0.99 (0.96-1) | 0.45 (0.334-0.62) | 0.62 (0.40-0.81) | 0.773 (0.614-0.910) |
| 0.8                                       | 2                               | 0.64 (0.090-1.00) | 1.00 (1.00-1) | 1.00 (1.00-1) | 0.53 (0.215-1.00) | 0.71 (0.27-1.00) | 0.903 (0.640-1.000) |
| 0.8                                       | 3                               | 0.54 (0.092-0.98) | 1.00 (0.99-1) | 1.00 (1.00-1) | 0.41 (0.215-0.94) | 0.63 (0.27-0.99) | 0.835 (0.626-0.999) |
| 0.8                                       | 4                               | 0.49 (0.070-0.92) | 0.99 (0.97-1) | 1.00 (0.98-1) | 0.37 (0.211-0.75) | 0.59 (0.25-0.93) | 0.797 (0.573-0.984) |
| 0.8                                       | 5                               | 0.46 (0.104-0.86) | 0.98 (0.93-1) | 0.99 (0.96-1) | 0.33 (0.217-0.61) | 0.57 (0.28-0.86) | 0.782 (0.615-0.937) |
| 0.9                                       | 2                               | 0.62 (0.086-1.00) | 1.00 (1.00-1) | 1.00 (1.00-1) | 0.38 (0.109-1.00) | 0.66 (0.18-1.00) | 0.883 (0.590-1.000) |
| 0.9                                       | 3                               | 0.56 (0.128-0.98) | 1.00 (0.98-1) | 1.00 (1.00-1) | 0.27 (0.114-0.85) | 0.60 (0.22-0.98) | 0.839 (0.622-0.998) |
| 0.9                                       | 4                               | 0.50 (0.129-0.88) | 0.98 (0.92-1) | 1.00 (0.99-1) | 0.21 (0.113-0.48) | 0.55 (0.22-0.89) | 0.799 (0.603-0.961) |
| 0.9                                       | 5                               | 0.52 (0.143-0.86) | 0.95 (0.83-1) | 0.99 (0.97-1) | 0.20 (0.115-0.40) | 0.56 (0.23-0.86) | 0.790 (0.597-0.938) |
| 0.95                                      | 2                               | 0.63 (0.086-1.00) | 1.00 (1.00-1) | 1.00 (1.00-1) | 0.29 (0.055-1.00) | 0.65 (0.13-1.00) | 0.892 (0.605-1.000) |
| 0.95                                      | 3                               | 0.55 (0.100-0.96) | 0.99 (0.96-1) | 1.00 (1.00-1) | 0.15 (0.056-0.59) | 0.57 (0.14-0.96) | 0.836 (0.584-0.993) |
| 0.95                                      | 4                               | 0.54 (0.077-0.93) | 0.94 (0.69-1) | 1.00 (0.98-1) | 0.13 (0.054-0.38) | 0.56 (0.12-0.92) | 0.794 (0.581-0.954) |
| 0.95                                      | 5                               | 0.60 (0.112-0.92) | 0.81 (0.46-1) | 0.99 (0.97-1) | 0.12 (0.056-0.27) | 0.61 (0.16-0.90) | 0.772 (0.584-0.911) |

Perturbed datasets in which s% (s%=5%, 10%, 20%, 30%, 40% or 50%) of the cases were designated to be therapy sensitive were generated. Within the 1-s% resistant cases, the cases were allocated randomly into n (n=2, 3, 4, 5) groups of resistance mechanisms and the case allocation for training and test datasets was performed independently. Furthermore, for each nth resistance mechanism, 100 genes were randomly selected as the "true" gene expression changes and were spiked-in by v (v=1, top; v=0.5, middle; v=1.5, bottom). Classification was performed using diagonal discriminating linear analysis (DLDA). For each combination of s and n, we repeated the spiking and classification 200 times. The mean value and the 95% confidence intervals of the performance measures for each combination of s and n are shown. Performance measures reported here are sensitivity, specificity, positive predictive value (PPV), negative predictive value (NPV), accuracy and the area under curve (AUC) of the receiver operating characteristic (ROC) curves.

**Supplementary Table S7: Impact of overlapping gene signatures on signature performance.**

Analysis of the impact of overlapping gene expression changes on the predictive gene signature performance, where the optimal (2-fold), weak (1.4-fold) or strong (2.8-fold) changes in gene expression were spiked-in.

| Optimal gene expression changes (2-fold) |                                 |         |                  |                  |                  |                   |                  |                     |
|------------------------------------------|---------------------------------|---------|------------------|------------------|------------------|-------------------|------------------|---------------------|
| Proportion of resistant cases            | Number of resistance mechanisms | Overlap | Sensitivity      | Specificity      | PPV              | NPV               | Accuracy         | AUC                 |
| 0.5                                      | 2                               | 0       | 0.99 (0.98-1.00) | 1.00 (0.99-1.00) | 1.00 (0.99-1.00) | 0.99 (0.978-1.00) | 0.99 (0.99-1.00) | 1.000 (0.999-1.000) |
| 0.5                                      | 2                               | 0.01    | 0.99 (0.97-1.00) | 1.00 (0.99-1.00) | 1.00 (0.99-1.00) | 0.99 (0.969-1.00) | 0.99 (0.98-1.00) | 1.000 (0.998-1.000) |
| 0.5                                      | 2                               | 0.05    | 0.99 (0.98-1.00) | 1.00 (0.99-1.00) | 1.00 (0.99-1.00) | 0.99 (0.979-1.00) | 1.00 (0.99-1.00) | 1.000 (0.999-1.000) |
| 0.5                                      | 2                               | 0.1     | 0.99 (0.99-1.00) | 1.00 (0.99-1.00) | 1.00 (0.99-1.00) | 0.99 (0.986-1.00) | 1.00 (0.99-1.00) | 1.000 (0.999-1.000) |
| 0.5                                      | 2                               | 0.2     | 1.00 (0.99-1.00) | 1.00 (1.00-1.00) | 1.00 (1.00-1.00) | 1.00 (0.989-1.00) | 1.00 (0.99-1.00) | 1.000 (1.000-1.000) |
| 0.5                                      | 2                               | 0.5     | 1.00 (1.00-1.00) | 1.00 (1.00-1.00) | 1.00 (1.00-1.00) | 1.00 (0.996-1.00) | 1.00 (1.00-1.00) | 1.000 (1.000-1.000) |
| 0.5                                      | 2                               | 0.9     | 1.00 (1.00-1.00) | 1.00 (1.00-1.00) | 1.00 (1.00-1.00) | 1.00 (1.000-1.00) | 1.00 (1.00-1.00) | 1.000 (1.000-1.000) |
| 0.5                                      | 3                               | 0       | 0.95 (0.93-0.97) | 0.97 (0.96-0.98) | 0.97 (0.96-0.98) | 0.95 (0.930-0.97) | 0.96 (0.94-0.98) | 0.992 (0.984-0.996) |
| 0.5                                      | 3                               | 0.01    | 0.96 (0.92-0.97) | 0.98 (0.95-0.99) | 0.98 (0.95-0.99) | 0.96 (0.924-0.98) | 0.97 (0.94-0.98) | 0.993 (0.984-0.997) |
| 0.5                                      | 3                               | 0.05    | 0.97 (0.95-0.99) | 0.99 (0.97-1.00) | 0.99 (0.97-1.00) | 0.98 (0.951-0.99) | 0.98 (0.96-0.99) | 0.998 (0.993-1.000) |
| 0.5                                      | 3                               | 0.1     | 0.99 (0.97-1.00) | 1.00 (0.98-1.00) | 0.99 (0.98-1.00) | 0.99 (0.966-1.00) | 0.99 (0.98-1.00) | 0.999 (0.997-1.000) |
| 0.5                                      | 3                               | 0.2     | 0.99 (0.98-1.00) | 1.00 (0.99-1.00) | 1.00 (0.99-1.00) | 0.99 (0.981-1.00) | 1.00 (0.99-1.00) | 1.000 (0.999-1.000) |
| 0.5                                      | 3                               | 0.5     | 1.00 (1.00-1.00) | 1.00 (1.00-1.00) | 1.00 (1.00-1.00) | 1.00 (0.996-1.00) | 1.00 (1.00-1.00) | 1.000 (1.000-1.000) |
| 0.5                                      | 3                               | 0.9     | 1.00 (1.00-1.00) | 1.00 (1.00-1.00) | 1.00 (1.00-1.00) | 1.00 (1.000-1.00) | 1.00 (1.00-1.00) | 1.000 (1.000-1.000) |
| 0.5                                      | 4                               | 0       | 0.90 (0.87-0.94) | 0.93 (0.90-0.95) | 0.92 (0.90-0.95) | 0.90 (0.872-0.94) | 0.91 (0.89-0.94) | 0.967 (0.950-0.979) |
| 0.5                                      | 4                               | 0.01    | 0.92 (0.87-0.95) | 0.94 (0.89-0.97) | 0.94 (0.89-0.97) | 0.92 (0.871-0.95) | 0.93 (0.89-0.96) | 0.975 (0.952-0.990) |
| 0.5                                      | 4                               | 0.05    | 0.95 (0.91-0.98) | 0.97 (0.93-0.99) | 0.97 (0.93-0.99) | 0.95 (0.909-0.98) | 0.96 (0.92-0.98) | 0.990 (0.972-0.998) |
| 0.5                                      | 4                               | 0.1     | 0.97 (0.95-0.99) | 0.99 (0.97-1.00) | 0.99 (0.97-1.00) | 0.97 (0.949-0.99) | 0.98 (0.96-0.99) | 0.997 (0.992-1.000) |
| 0.5                                      | 4                               | 0.2     | 0.99 (0.98-1.00) | 1.00 (0.99-1.00) | 1.00 (0.99-1.00) | 0.99 (0.977-1.00) | 0.99 (0.98-1.00) | 1.000 (0.999-1.000) |
| 0.5                                      | 4                               | 0.5     | 1.00 (1.00-1.00) | 1.00 (1.00-1.00) | 1.00 (1.00-1.00) | 1.00 (0.996-1.00) | 1.00 (1.00-1.00) | 1.000 (1.000-1.000) |
| 0.5                                      | 4                               | 0.9     | 1.00 (1.00-1.00) | 1.00 (1.00-1.00) | 1.00 (1.00-1.00) | 1.00 (1.000-1.00) | 1.00 (1.00-1.00) | 1.000 (1.000-1.000) |
| 0.5                                      | 5                               | 0       | 0.85 (0.81-0.89) | 0.87 (0.83-0.90) | 0.87 (0.82-0.90) | 0.85 (0.814-0.89) | 0.86 (0.82-0.89) | 0.926 (0.897-0.948) |
| 0.5                                      | 5                               | 0.01    | 0.88 (0.82-0.92) | 0.90 (0.85-0.94) | 0.90 (0.85-0.94) | 0.88 (0.829-0.93) | 0.89 (0.84-0.93) | 0.950 (0.909-0.975) |
| 0.5                                      | 5                               | 0.05    | 0.93 (0.88-0.96) | 0.95 (0.89-0.98) | 0.95 (0.89-0.98) | 0.93 (0.877-0.96) | 0.94 (0.89-0.97) | 0.981 (0.950-0.994) |
| 0.5                                      | 5                               | 0.1     | 0.97 (0.93-0.99) | 0.98 (0.95-1.00) | 0.98 (0.95-1.00) | 0.97 (0.930-0.99) | 0.97 (0.94-0.99) | 0.995 (0.986-1.000) |
| 0.5                                      | 5                               | 0.2     | 0.99 (0.97-1.00) | 1.00 (0.98-1.00) | 1.00 (0.98-1.00) | 0.99 (0.969-1.00) | 0.99 (0.97-1.00) | 0.999 (0.997-1.000) |
| 0.5                                      | 5                               | 0.5     | 1.00 (1.00-1.00) | 1.00 (1.00-1.00) | 1.00 (1.00-1.00) | 1.00 (0.996-1.00) | 1.00 (1.00-1.00) | 1.000 (1.000-1.000) |
| 0.5                                      | 5                               | 0.9     | 1.00 (1.00-1.00) | 1.00 (1.00-1.00) | 1.00 (1.00-1.00) | 1.00 (1.000-1.00) | 1.00 (1.00-1.00) | 1.000 (1.000-1.000) |
| 0.6                                      | 2                               | 0       | 0.99 (0.98-1.00) | 1.00 (0.99-1.00) | 1.00 (0.99-1.00) | 0.98 (0.967-1.00) | 0.99 (0.98-1.00) | 1.000 (0.999-1.000) |
| 0.6                                      | 2                               | 0.01    | 0.99 (0.98-1.00) | 1.00 (0.99-1.00) | 1.00 (0.99-1.00) | 0.99 (0.965-1.00) | 0.99 (0.98-1.00) | 1.000 (0.998-1.000) |
| 0.6                                      | 2                               | 0.05    | 0.99 (0.98-1.00) | 1.00 (1.00-1.00) | 1.00 (1.00-1.00) | 0.99 (0.974-1.00) | 0.99 (0.99-1.00) | 1.000 (0.999-1.000) |
| 0.6                                      | 2                               | 0.1     | 1.00 (0.99-1.00) | 1.00 (1.00-1.00) | 1.00 (1.00-1.00) | 0.99 (0.985-1.00) | 1.00 (0.99-1.00) | 1.000 (1.000-1.000) |
| 0.6                                      | 2                               | 0.2     | 1.00 (0.99-1.00) | 1.00 (1.00-1.00) | 1.00 (1.00-1.00) | 1.00 (0.987-1.00) | 1.00 (0.99-1.00) | 1.000 (1.000-1.000) |
| 0.6                                      | 2                               | 0.5     | 1.00 (1.00-1.00) | 1.00 (1.00-1.00) | 1.00 (1.00-1.00) | 1.00 (0.995-1.00) | 1.00 (1.00-1.00) | 1.000 (1.000-1.000) |
| 0.6                                      | 2                               | 0.9     | 1.00 (1.00-1.00) | 1.00 (1.00-1.00) | 1.00 (1.00-1.00) | 1.00 (1.000-1.00) | 1.00 (1.00-1.00) | 1.000 (1.000-1.000) |
| 0.6                                      | 3                               | 0       | 0.96 (0.92-0.98) | 0.97 (0.94-0.99) | 0.98 (0.96-0.99) | 0.94 (0.893-0.96) | 0.96 (0.93-0.98) | 0.992 (0.982-0.996) |
| 0.6                                      | 3                               | 0.01    | 0.96 (0.93-0.98) | 0.97 (0.95-0.99) | 0.98 (0.96-0.99) | 0.94 (0.906-0.97) | 0.97 (0.94-0.98) | 0.993 (0.983-0.998) |
| 0.6                                      | 3                               | 0.05    | 0.98 (0.95-0.99) | 0.99 (0.96-1.00) | 0.99 (0.98-1.00) | 0.97 (0.928-0.99) | 0.98 (0.96-0.99) | 0.997 (0.991-1.000) |
| 0.6                                      | 3                               | 0.1     | 0.99 (0.97-1.00) | 0.99 (0.98-1.00) | 1.00 (0.99-1.00) | 0.98 (0.953-1.00) | 0.99 (0.97-1.00) | 0.999 (0.997-1.000) |
| 0.6                                      | 3                               | 0.2     | 0.99 (0.98-1.00) | 1.00 (0.99-1.00) | 1.00 (0.99-1.00) | 0.99 (0.974-1.00) | 1.00 (0.99-1.00) | 1.000 (0.999-1.000) |
| 0.6                                      | 3                               | 0.5     | 1.00 (1.00-1.00) | 1.00 (1.00-1.00) | 1.00 (1.00-1.00) | 1.00 (0.995-1.00) | 1.00 (1.00-1.00) | 1.000 (1.000-1.000) |
| 0.6                                      | 3                               | 0.9     | 1.00 (1.00-1.00) | 1.00 (1.00-1.00) | 1.00 (1.00-1.00) | 1.00 (1.000-1.00) | 1.00 (1.00-1.00) | 1.000 (1.000-1.000) |
| 0.6                                      | 4                               | 0       | 0.91 (0.88-0.94) | 0.91 (0.87-0.94) | 0.94 (0.91-0.96) | 0.87 (0.828-0.91) | 0.91 (0.88-0.94) | 0.966 (0.945-0.978) |
| 0.6                                      | 4                               | 0.01    | 0.92 (0.88-0.95) | 0.93 (0.88-0.96) | 0.95 (0.92-0.98) | 0.89 (0.833-0.93) | 0.93 (0.88-0.96) | 0.974 (0.946-0.989) |
| 0.6                                      | 4                               | 0.05    | 0.96 (0.92-0.98) | 0.97 (0.93-0.99) | 0.98 (0.95-0.99) | 0.94 (0.888-0.98) | 0.96 (0.92-0.98) | 0.991 (0.978-0.998) |
| 0.6                                      | 4                               | 0.1     | 0.98 (0.95-0.99) | 0.99 (0.96-1.00) | 0.99 (0.98-1.00) | 0.97 (0.932-0.99) | 0.98 (0.96-0.99) | 0.998 (0.993-1.000) |
| 0.6                                      | 4                               | 0.2     | 0.99 (0.98-1.00) | 1.00 (0.99-1.00) | 1.00 (0.99-1.00) | 0.99 (0.968-1.00) | 0.99 (0.98-1.00) | 1.000 (0.998-1.000) |
| 0.6                                      | 4                               | 0.5     | 1.00 (1.00-1.00) | 1.00 (1.00-1.00) | 1.00 (1.00-1.00) | 1.00 (0.995-1.00) | 1.00 (1.00-1.00) | 1.000 (1.000-1.000) |
| 0.6                                      | 4                               | 0.9     | 1.00 (1.00-1.00) | 1.00 (1.00-1.00) | 1.00 (1.00-1.00) | 1.00 (0.997-1.00) | 1.00 (1.00-1.00) | 1.000 (1.000-1.000) |
| 0.6                                      | 5                               | 0       | 0.87 (0.83-0.90) | 0.84 (0.80-0.88) | 0.89 (0.86-0.92) | 0.81 (0.760-0.86) | 0.86 (0.82-0.89) | 0.925 (0.891-0.948) |
| 0.6                                      | 5                               | 0.01    | 0.89 (0.84-0.93) | 0.88 (0.82-0.93) | 0.91 (0.88-0.95) | 0.84 (0.781-0.90) | 0.88 (0.84-0.93) | 0.946 (0.912-0.976) |
| 0.6                                      | 5                               | 0.05    | 0.94 (0.90-0.98) | 0.94 (0.89-0.98) | 0.96 (0.93-0.99) | 0.92 (0.854-0.96) | 0.94 (0.90-0.97) | 0.984 (0.960-0.996) |
| 0.6                                      | 5                               | 0.1     | 0.97 (0.94-0.99) | 0.98 (0.95-0.99) | 0.98 (0.96-1.00) | 0.96 (0.916-0.98) | 0.97 (0.94-0.99) | 0.996 (0.985-0.999) |
| 0.6                                      | 5                               | 0.2     | 0.99 (0.98-1.00) | 1.00 (0.99-1.00) | 1.00 (0.99-1.00) | 0.99 (0.967-1.00) | 0.99 (0.98-1.00) | 1.000 (0.997-1.000) |
| 0.6                                      | 5                               | 0.5     | 1.00 (1.00-1.00) | 1.00 (1.00-1.00) | 1.00 (1.00-1.00) | 1.00 (0.995-1.00) | 1.00 (1.00-1.00) | 1.000 (1.000-1.000) |
| 0.6                                      | 5                               | 0.9     | 1.00 (1.00-1.00) | 1.00 (1.00-1.00) | 1.00 (1.00-1.00) | 1.00 (1.000-1.00) | 1.00 (1.00-1.00) | 1.000 (1.000-1.000) |
| 0.7                                      | 2                               | 0       | 0.99 (0.98-1.00) | 1.00 (0.99-1.00) | 1.00 (1.00-1.00) | 0.98 (0.957-0.99) | 0.99 (0.98-1.00) | 1.000 (0.999-1.000) |
| 0.7                                      | 2                               | 0.01    | 0.99 (0.98-1.00) | 1.00 (0.99-1.00) | 1.00 (0.99-1.00) | 0.98 (0.953-0.99) | 0.99 (0.98-1.00) | 1.000 (0.998-1.000) |
| 0.7                                      | 2                               | 0.05    | 0.99 (0.98-1.00) | 1.00 (0.99-1.00) | 1.00 (0.99-1.00) | 0.98 (0.962-0.99) | 0.99 (0.98-1.00) | 1.000 (0.999-1.000) |
| 0.7                                      | 2                               | 0.1     | 1.00 (0.99-1.00) | 1.00 (0.99-1.00) | 1.00 (1.00-1.00) | 0.99 (0.968-1.00) | 1.00 (0.99-1.00) | 1.000 (0.999-1.000) |
| 0.7                                      | 2                               | 0.2     | 1.00 (0.99-1.00) | 1.00 (0.99-1.00) | 1.00 (1.00-1.00) | 0.99 (0.979-1.00) | 1.00 (0.99-1.00) | 1.000 (1.000-1.000) |
| 0.7                                      | 2                               | 0.5     | 1.00 (1.00-1.00) | 1.00 (1.00-1.00) | 1.00 (1.00-1.00) | 1.00 (0.994-1.00) | 1.00 (1.00-1.00) | 1.000 (1.000-1.000) |
| 0.7                                      | 2                               | 0.9     | 1.00 (1.00-1.00) | 1.00 (1.00-1.00) | 1.00 (1.00-1.00) | 1.00 (1.000-1.00) | 1.00 (1.00-1.00) | 1.000 (1.000-1.000) |
| 0.7                                      | 3                               | 0       | 0.96 (0.94-0.98) | 0.96 (0.92-0.98) | 0.98 (0.96-0.99) | 0.91 (0.857-0.95) | 0.96 (0.93-0.98) | 0.991 (0.978-0.996) |
| 0.7                                      | 3                               | 0.01    | 0.96 (0.93-0.98) | 0.96 (0.93-0.99) | 0.98 (0.97-0.99) | 0.92 (0.851-0.96) | 0.96 (0.93-0.98) | 0.992 (0.980-0.997) |
| 0.7                                      | 3                               | 0.05    | 0.98 (0.96-0.99) | 0.98 (0.95-0.99) | 0.99 (0.98-1.00) | 0.95 (0.918-0.98) | 0.96 (0.96-0.99) | 0.997 (0.992-1.000) |
| 0.7                                      | 3                               | 0.1     | 0.99 (0.98-1.00) | 0.99 (0.98-1.00) | 1.00 (0.99-1.00) | 0.97 (0.951-0.99) | 0.99 (0.98-1.00) | 0.999 (0.998-1.000) |
| 0.7                                      | 3                               | 0.2     | 0.99 (0.98-1.00) | 1.00 (0.99-1.00) | 1.00 (0.99-1.00) | 0.99 (0.958-1.00) | 1.00 (0.98-1.00) | 1.000 (0.999-1.000) |
| 0.7                                      | 3                               | 0.5     | 1.00 (1.00-1.00) | 1.00 (1.00-1.00) | 1.00 (1.00-1.00) | 1.00 (0.990-1.00) | 1.00 (1.00-1.00) | 1.000 (1.000-1.000) |
| 0.7                                      | 3                               | 0.9     | 1.00 (1.00-1.00) | 1.00 (1.00-1.00) | 1.00 (1.00-1.00) | 1.00 (1.000-1.00) | 1.00 (1.00-1.00) | 1.000 (1.000-1.000) |

Supplementary Table S7  
Page 2

|      |   |      |                  |                  |                  |                   |                  |                     |
|------|---|------|------------------|------------------|------------------|-------------------|------------------|---------------------|
| 0.7  | 4 | 0    | 0.92 (0.88-0.95) | 0.89 (0.84-0.92) | 0.95 (0.93-0.96) | 0.82 (0.748-0.88) | 0.91 (0.87-0.94) | 0.962 (0.927-0.977) |
| 0.7  | 4 | 0.01 | 0.93 (0.88-0.96) | 0.91 (0.84-0.95) | 0.96 (0.93-0.98) | 0.85 (0.754-0.92) | 0.92 (0.87-0.96) | 0.972 (0.936-0.988) |
| 0.7  | 4 | 0.05 | 0.96 (0.93-0.98) | 0.95 (0.91-0.98) | 0.98 (0.96-0.99) | 0.91 (0.846-0.96) | 0.96 (0.93-0.98) | 0.990 (0.975-0.996) |
| 0.7  | 4 | 0.1  | 0.98 (0.97-0.99) | 0.98 (0.96-0.99) | 0.99 (0.98-1.00) | 0.96 (0.926-0.98) | 0.98 (0.97-0.99) | 0.998 (0.994-1.000) |
| 0.7  | 4 | 0.2  | 0.99 (0.98-1.00) | 1.00 (0.98-1.00) | 1.00 (0.99-1.00) | 0.98 (0.952-1.00) | 0.99 (0.98-1.00) | 1.000 (0.998-1.000) |
| 0.7  | 4 | 0.5  | 1.00 (0.99-1.00) | 1.00 (1.00-1.00) | 1.00 (1.00-1.00) | 1.00 (0.987-1.00) | 1.00 (1.00-1.00) | 1.000 (1.000-1.000) |
| 0.7  | 4 | 0.9  | 1.00 (1.00-1.00) | 1.00 (1.00-1.00) | 1.00 (1.00-1.00) | 1.00 (1.000-1.00) | 1.00 (1.00-1.00) | 1.000 (1.000-1.000) |
| 0.7  | 5 | 0    | 0.88 (0.83-0.92) | 0.81 (0.75-0.85) | 0.91 (0.89-0.94) | 0.74 (0.662-0.81) | 0.86 (0.81-0.90) | 0.920 (0.876-0.950) |
| 0.7  | 5 | 0.01 | 0.90 (0.84-0.94) | 0.85 (0.78-0.90) | 0.93 (0.90-0.96) | 0.78 (0.673-0.87) | 0.88 (0.82-0.93) | 0.942 (0.880-0.972) |
| 0.7  | 5 | 0.05 | 0.95 (0.91-0.97) | 0.93 (0.86-0.97) | 0.97 (0.94-0.99) | 0.89 (0.807-0.94) | 0.94 (0.89-0.97) | 0.982 (0.953-0.994) |
| 0.7  | 5 | 0.1  | 0.98 (0.96-0.99) | 0.97 (0.94-0.99) | 0.99 (0.97-1.00) | 0.95 (0.904-0.98) | 0.98 (0.95-0.99) | 0.996 (0.990-0.999) |
| 0.7  | 5 | 0.2  | 0.99 (0.98-1.00) | 0.99 (0.98-1.00) | 1.00 (0.99-1.00) | 0.98 (0.944-1.00) | 0.99 (0.98-1.00) | 1.000 (0.998-1.000) |
| 0.7  | 5 | 0.5  | 1.00 (1.00-1.00) | 1.00 (1.00-1.00) | 1.00 (1.00-1.00) | 1.00 (0.990-1.00) | 1.00 (1.00-1.00) | 1.000 (1.000-1.000) |
| 0.7  | 5 | 0.9  | 1.00 (1.00-1.00) | 1.00 (1.00-1.00) | 1.00 (1.00-1.00) | 1.00 (1.000-1.00) | 1.00 (1.00-1.00) | 1.000 (1.000-1.000) |
| 0.8  | 2 | 0    | 0.99 (0.98-1.00) | 1.00 (0.98-1.00) | 1.00 (1.00-1.00) | 0.97 (0.927-0.99) | 0.99 (0.98-1.00) | 1.000 (0.998-1.000) |
| 0.8  | 2 | 0.01 | 0.99 (0.98-1.00) | 1.00 (0.98-1.00) | 1.00 (1.00-1.00) | 0.97 (0.932-0.99) | 0.99 (0.98-1.00) | 1.000 (0.998-1.000) |
| 0.8  | 2 | 0.05 | 0.99 (0.98-1.00) | 1.00 (0.98-1.00) | 1.00 (1.00-1.00) | 0.98 (0.926-1.00) | 0.99 (0.98-1.00) | 1.000 (0.999-1.000) |
| 0.8  | 2 | 0.1  | 1.00 (0.99-1.00) | 1.00 (0.99-1.00) | 1.00 (1.00-1.00) | 0.98 (0.945-1.00) | 1.00 (0.99-1.00) | 1.000 (0.999-1.000) |
| 0.8  | 2 | 0.2  | 1.00 (0.99-1.00) | 1.00 (1.00-1.00) | 1.00 (1.00-1.00) | 0.99 (0.972-1.00) | 1.00 (0.99-1.00) | 1.000 (1.000-1.000) |
| 0.8  | 2 | 0.5  | 1.00 (1.00-1.00) | 1.00 (1.00-1.00) | 1.00 (1.00-1.00) | 1.00 (0.990-1.00) | 1.00 (1.00-1.00) | 1.000 (1.000-1.000) |
| 0.8  | 2 | 0.9  | 1.00 (1.00-1.00) | 1.00 (1.00-1.00) | 1.00 (1.00-1.00) | 1.00 (1.000-1.00) | 1.00 (1.00-1.00) | 1.000 (1.000-1.000) |
| 0.8  | 3 | 0    | 0.97 (0.94-0.98) | 0.95 (0.91-0.97) | 0.99 (0.98-0.99) | 0.88 (0.782-0.92) | 0.96 (0.93-0.98) | 0.990 (0.978-0.995) |
| 0.8  | 3 | 0.01 | 0.97 (0.95-0.99) | 0.95 (0.92-0.98) | 0.99 (0.98-1.00) | 0.89 (0.821-0.95) | 0.97 (0.95-0.98) | 0.992 (0.986-0.998) |
| 0.8  | 3 | 0.05 | 0.98 (0.96-1.00) | 0.98 (0.94-1.00) | 0.99 (0.98-1.00) | 0.93 (0.847-0.98) | 0.98 (0.96-1.00) | 0.997 (0.991-1.000) |
| 0.8  | 3 | 0.1  | 0.99 (0.98-1.00) | 0.99 (0.97-1.00) | 1.00 (0.99-1.00) | 0.96 (0.910-0.99) | 0.99 (0.97-1.00) | 0.999 (0.996-1.000) |
| 0.8  | 3 | 0.2  | 1.00 (0.99-1.00) | 1.00 (0.99-1.00) | 1.00 (1.00-1.00) | 0.98 (0.953-1.00) | 1.00 (0.99-1.00) | 1.000 (0.999-1.000) |
| 0.8  | 3 | 0.5  | 1.00 (1.00-1.00) | 1.00 (1.00-1.00) | 1.00 (1.00-1.00) | 1.00 (0.990-1.00) | 1.00 (1.00-1.00) | 1.000 (1.000-1.000) |
| 0.8  | 3 | 0.9  | 1.00 (1.00-1.00) | 1.00 (1.00-1.00) | 1.00 (1.00-1.00) | 1.00 (0.997-1.00) | 1.00 (1.00-1.00) | 1.000 (1.000-1.000) |
| 0.8  | 4 | 0    | 0.93 (0.89-0.96) | 0.86 (0.81-0.90) | 0.96 (0.95-0.98) | 0.76 (0.653-0.84) | 0.92 (0.88-0.94) | 0.961 (0.933-0.977) |
| 0.8  | 4 | 0.01 | 0.94 (0.91-0.97) | 0.88 (0.81-0.93) | 0.97 (0.95-0.98) | 0.79 (0.693-0.88) | 0.93 (0.89-0.96) | 0.969 (0.942-0.988) |
| 0.8  | 4 | 0.05 | 0.97 (0.93-0.99) | 0.94 (0.87-0.99) | 0.98 (0.97-1.00) | 0.87 (0.766-0.95) | 0.96 (0.92-0.99) | 0.989 (0.966-0.998) |
| 0.8  | 4 | 0.1  | 0.98 (0.96-0.99) | 0.97 (0.93-1.00) | 0.99 (0.98-1.00) | 0.93 (0.852-0.98) | 0.98 (0.96-0.99) | 0.997 (0.989-1.000) |
| 0.8  | 4 | 0.2  | 0.99 (0.98-1.00) | 1.00 (0.98-1.00) | 1.00 (0.99-1.00) | 0.98 (0.933-1.00) | 0.99 (0.98-1.00) | 1.000 (0.998-1.000) |
| 0.8  | 4 | 0.5  | 1.00 (1.00-1.00) | 1.00 (1.00-1.00) | 1.00 (1.00-1.00) | 1.00 (0.990-1.00) | 1.00 (1.00-1.00) | 1.000 (1.000-1.000) |
| 0.8  | 4 | 0.9  | 1.00 (1.00-1.00) | 1.00 (1.00-1.00) | 1.00 (1.00-1.00) | 1.00 (1.000-1.00) | 1.00 (1.00-1.00) | 1.000 (1.000-1.000) |
| 0.8  | 5 | 0    | 0.90 (0.86-0.93) | 0.75 (0.70-0.80) | 0.93 (0.92-0.95) | 0.65 (0.562-0.74) | 0.87 (0.83-0.90) | 0.915 (0.881-0.942) |
| 0.8  | 5 | 0.01 | 0.91 (0.87-0.95) | 0.79 (0.72-0.87) | 0.95 (0.93-0.97) | 0.70 (0.576-0.80) | 0.89 (0.84-0.93) | 0.934 (0.885-0.970) |
| 0.8  | 5 | 0.05 | 0.96 (0.91-0.98) | 0.90 (0.82-0.97) | 0.98 (0.95-0.99) | 0.84 (0.684-0.93) | 0.95 (0.89-0.98) | 0.980 (0.942-0.997) |
| 0.8  | 5 | 0.1  | 0.98 (0.94-0.99) | 0.96 (0.89-1.00) | 0.99 (0.97-1.00) | 0.91 (0.780-0.96) | 0.97 (0.93-0.99) | 0.994 (0.973-0.999) |
| 0.8  | 5 | 0.2  | 0.99 (0.98-1.00) | 0.99 (0.97-1.00) | 1.00 (0.99-1.00) | 0.97 (0.918-1.00) | 0.99 (0.98-1.00) | 0.999 (0.997-1.000) |
| 0.8  | 5 | 0.5  | 1.00 (1.00-1.00) | 1.00 (1.00-1.00) | 1.00 (1.00-1.00) | 1.00 (0.985-1.00) | 1.00 (1.00-1.00) | 1.000 (1.000-1.000) |
| 0.8  | 5 | 0.9  | 1.00 (1.00-1.00) | 1.00 (1.00-1.00) | 1.00 (1.00-1.00) | 1.00 (0.990-1.00) | 1.00 (1.00-1.00) | 1.000 (1.000-1.000) |
| 0.9  | 2 | 0    | 0.99 (0.98-1.00) | 0.99 (0.96-1.00) | 1.00 (1.00-1.00) | 0.94 (0.850-0.98) | 0.99 (0.98-1.00) | 0.999 (0.998-1.000) |
| 0.9  | 2 | 0.01 | 0.99 (0.98-1.00) | 0.99 (0.97-1.00) | 1.00 (1.00-1.00) | 0.94 (0.854-0.98) | 0.99 (0.98-1.00) | 1.000 (0.998-1.000) |
| 0.9  | 2 | 0.05 | 1.00 (0.99-1.00) | 1.00 (0.98-1.00) | 1.00 (1.00-1.00) | 0.96 (0.894-0.99) | 0.99 (0.99-1.00) | 1.000 (0.999-1.000) |
| 0.9  | 2 | 0.1  | 1.00 (0.99-1.00) | 1.00 (0.98-1.00) | 1.00 (1.00-1.00) | 0.97 (0.900-1.00) | 1.00 (0.99-1.00) | 1.000 (0.999-1.000) |
| 0.9  | 2 | 0.2  | 1.00 (0.99-1.00) | 1.00 (0.99-1.00) | 1.00 (1.00-1.00) | 0.99 (0.936-1.00) | 1.00 (0.99-1.00) | 1.000 (1.000-1.000) |
| 0.9  | 2 | 0.5  | 1.00 (1.00-1.00) | 1.00 (1.00-1.00) | 1.00 (1.00-1.00) | 1.00 (0.990-1.00) | 1.00 (1.00-1.00) | 1.000 (1.000-1.000) |
| 0.9  | 2 | 0.9  | 1.00 (1.00-1.00) | 1.00 (1.00-1.00) | 1.00 (1.00-1.00) | 1.00 (1.000-1.00) | 1.00 (1.00-1.00) | 1.000 (1.000-1.000) |
| 0.9  | 3 | 0    | 0.97 (0.94-0.99) | 0.90 (0.83-0.96) | 0.99 (0.98-1.00) | 0.78 (0.603-0.89) | 0.96 (0.93-0.98) | 0.986 (0.963-0.995) |
| 0.9  | 3 | 0.01 | 0.97 (0.95-0.99) | 0.92 (0.86-0.97) | 0.99 (0.98-1.00) | 0.80 (0.666-0.90) | 0.97 (0.94-0.98) | 0.990 (0.972-0.997) |
| 0.9  | 3 | 0.05 | 0.98 (0.97-1.00) | 0.96 (0.90-1.00) | 1.00 (0.99-1.00) | 0.88 (0.766-0.96) | 0.98 (0.96-0.99) | 0.996 (0.987-1.000) |
| 0.9  | 3 | 0.1  | 0.99 (0.97-1.00) | 0.98 (0.93-1.00) | 1.00 (0.99-1.00) | 0.93 (0.788-0.98) | 0.99 (0.97-1.00) | 0.999 (0.992-1.000) |
| 0.9  | 3 | 0.2  | 1.00 (0.98-1.00) | 1.00 (0.96-1.00) | 1.00 (1.00-1.00) | 0.97 (0.879-1.00) | 1.00 (0.98-1.00) | 1.000 (0.998-1.000) |
| 0.9  | 3 | 0.5  | 1.00 (1.00-1.00) | 1.00 (1.00-1.00) | 1.00 (1.00-1.00) | 1.00 (0.981-1.00) | 1.00 (1.00-1.00) | 1.000 (1.000-1.000) |
| 0.9  | 3 | 0.9  | 1.00 (1.00-1.00) | 1.00 (1.00-1.00) | 1.00 (1.00-1.00) | 1.00 (1.000-1.00) | 1.00 (1.00-1.00) | 1.000 (1.000-1.000) |
| 0.9  | 4 | 0    | 0.94 (0.89-0.97) | 0.72 (0.64-0.77) | 0.97 (0.96-0.97) | 0.59 (0.404-0.71) | 0.92 (0.87-0.95) | 0.939 (0.884-0.969) |
| 0.9  | 4 | 0.01 | 0.95 (0.91-0.97) | 0.77 (0.70-0.88) | 0.97 (0.96-0.99) | 0.64 (0.462-0.78) | 0.93 (0.89-0.96) | 0.954 (0.904-0.984) |
| 0.9  | 4 | 0.05 | 0.97 (0.94-0.99) | 0.89 (0.79-0.96) | 0.99 (0.98-1.00) | 0.79 (0.600-0.92) | 0.96 (0.93-0.99) | 0.986 (0.953-0.998) |
| 0.9  | 4 | 0.1  | 0.98 (0.95-1.00) | 0.95 (0.87-0.99) | 0.99 (0.98-1.00) | 0.88 (0.691-0.96) | 0.98 (0.95-0.99) | 0.995 (0.981-1.000) |
| 0.9  | 4 | 0.2  | 0.99 (0.98-1.00) | 0.99 (0.96-1.00) | 1.00 (1.00-1.00) | 0.96 (0.853-1.00) | 0.99 (0.98-1.00) | 1.000 (0.997-1.000) |
| 0.9  | 4 | 0.5  | 1.00 (1.00-1.00) | 1.00 (1.00-1.00) | 1.00 (1.00-1.00) | 1.00 (0.981-1.00) | 1.00 (1.00-1.00) | 1.000 (1.000-1.000) |
| 0.9  | 4 | 0.9  | 1.00 (1.00-1.00) | 1.00 (1.00-1.00) | 1.00 (1.00-1.00) | 1.00 (1.000-1.00) | 1.00 (1.00-1.00) | 1.000 (1.000-1.000) |
| 0.9  | 5 | 0    | 0.91 (0.84-0.94) | 0.54 (0.44-0.62) | 0.95 (0.94-0.96) | 0.41 (0.268-0.50) | 0.87 (0.81-0.90) | 0.855 (0.783-0.905) |
| 0.9  | 5 | 0.01 | 0.92 (0.87-0.96) | 0.61 (0.50-0.75) | 0.95 (0.94-0.97) | 0.47 (0.300-0.69) | 0.89 (0.83-0.94) | 0.889 (0.806-0.963) |
| 0.9  | 5 | 0.05 | 0.96 (0.92-0.99) | 0.80 (0.67-0.92) | 0.98 (0.96-0.99) | 0.71 (0.493-0.89) | 0.95 (0.90-0.98) | 0.966 (0.905-0.996) |
| 0.9  | 5 | 0.1  | 0.98 (0.95-0.99) | 0.90 (0.80-0.97) | 0.99 (0.98-1.00) | 0.83 (0.632-0.95) | 0.97 (0.93-0.99) | 0.988 (0.958-0.999) |
| 0.9  | 5 | 0.2  | 0.99 (0.98-1.00) | 0.99 (0.95-1.00) | 1.00 (0.99-1.00) | 0.95 (0.845-0.99) | 0.99 (0.98-1.00) | 0.999 (0.996-1.000) |
| 0.9  | 5 | 0.5  | 1.00 (1.00-1.00) | 1.00 (1.00-1.00) | 1.00 (1.00-1.00) | 1.00 (0.981-1.00) | 1.00 (1.00-1.00) | 1.000 (1.000-1.000) |
| 0.9  | 5 | 0.9  | 1.00 (1.00-1.00) | 1.00 (1.00-1.00) | 1.00 (1.00-1.00) | 1.00 (1.000-1.00) | 1.00 (1.00-1.00) | 1.000 (1.000-1.000) |
| 0.95 | 2 | 0    | 0.99 (0.98-1.00) | 0.98 (0.92-1.00) | 1.00 (1.00-1.00) | 0.89 (0.743-0.96) | 0.99 (0.98-1.00) | 0.999 (0.996-1.000) |
| 0.95 | 2 | 0.01 | 0.99 (0.98-1.00) | 0.98 (0.92-1.00) | 1.00 (1.00-1.00) | 0.90 (0.743-0.96) | 0.99 (0.98-1.00) | 0.999 (0.996-1.000) |
| 0.95 | 2 | 0.05 | 1.00 (0.99-1.00) | 0.99 (0.96-1.00) | 1.00 (1.00-1.00) | 0.92 (0.788-1.00) | 0.99 (0.99-1.00) | 1.000 (0.998-1.000) |
| 0.95 | 2 | 0.1  | 1.00 (0.99-1.00) | 0.99 (0.96-1.00) | 1.00 (1.00-1.00) | 0.95 (0.846-1.00) | 1.00 (0.99-1.00) | 1.000 (0.999-1.000) |
| 0.95 | 2 | 0.2  | 1.00 (0.99-1.00) | 1.00 (0.96-1.00) | 1.00 (1.00-1.00) | 0.98 (0.896-1.00) | 1.00 (0.99-1.00) | 1.000 (1.000-1.000) |
| 0.95 | 2 | 0.5  | 1.00 (1.00-1.00) | 1.00 (1.00-1.00) | 1.00 (1.00-1.00) | 1.00 (0.963-1.00) | 1.00 (1.00-1.00) | 1.000 (1.000-1.000) |
| 0.95 | 2 | 0.9  | 1.00 (1.00-1.00) | 1.00 (1.00-1.00) | 1.00 (1.00-1.00) | 1.00 (1.000-1.00) | 1.00 (1.00-1.00) | 1.000 (1.000-1.000) |
| 0.95 | 3 | 0    | 0.96 (0.91-0.99) | 0.66 (0.52-0.77) | 0.98 (0.97-0.99) | 0.51 (0.246-0.73) | 0.95 (0.90-0.97) | 0.950 (0.872-0.982) |
| 0.95 | 3 | 0.01 | 0.97 (0.94-0.99) | 0.70 (0.55-0.83) | 0.98 (0.98-0.99) | 0.57 (0.323-0.77) | 0.96 (0.92-0.98) | 0.961 (0.891-0.989) |
| 0.95 | 3 | 0.05 | 0.98 (0.96-0.99) | 0.83 (0.72-0.94) | 0.99 (0.99-1.00) | 0.72 (0.517-0.88) | 0.98 (0.95-0.99) | 0.986 (0.953-0.997) |



Supplementary Table S7  
Page 3

|      |   |      |                  |                  |                  |                   |                  |                     |
|------|---|------|------------------|------------------|------------------|-------------------|------------------|---------------------|
| 0.95 | 3 | 0.1  | 0.99 (0.96-1.00) | 0.92 (0.80-1.00) | 1.00 (0.99-1.00) | 0.83 (0.533-0.96) | 0.99 (0.96-1.00) | 0.995 (0.970-1.000) |
| 0.95 | 3 | 0.2  | 1.00 (0.98-1.00) | 0.98 (0.92-1.00) | 1.00 (1.00-1.00) | 0.92 (0.731-1.00) | 0.99 (0.98-1.00) | 0.999 (0.995-1.000) |
| 0.95 | 3 | 0.5  | 1.00 (1.00-1.00) | 1.00 (1.00-1.00) | 1.00 (1.00-1.00) | 1.00 (0.962-1.00) | 1.00 (1.00-1.00) | 1.000 (1.000-1.000) |
| 0.95 | 3 | 0.9  | 1.00 (1.00-1.00) | 1.00 (1.00-1.00) | 1.00 (1.00-1.00) | 1.00 (1.000-1.00) | 1.00 (1.00-1.00) | 1.000 (1.000-1.000) |
| 0.95 | 4 | 0    | 0.92 (0.84-0.96) | 0.35 (0.23-0.46) | 0.96 (0.96-0.97) | 0.21 (0.115-0.35) | 0.89 (0.82-0.93) | 0.788 (0.696-0.876) |
| 0.95 | 4 | 0.01 | 0.93 (0.87-0.97) | 0.39 (0.27-0.54) | 0.97 (0.96-0.97) | 0.24 (0.130-0.41) | 0.90 (0.85-0.94) | 0.816 (0.722-0.900) |
| 0.95 | 4 | 0.05 | 0.96 (0.93-0.98) | 0.58 (0.40-0.73) | 0.98 (0.97-0.99) | 0.46 (0.248-0.68) | 0.94 (0.91-0.97) | 0.924 (0.843-0.976) |
| 0.95 | 4 | 0.1  | 0.98 (0.94-1.00) | 0.75 (0.57-0.88) | 0.99 (0.98-0.99) | 0.68 (0.352-0.91) | 0.97 (0.92-0.99) | 0.974 (0.899-0.996) |
| 0.95 | 4 | 0.2  | 0.99 (0.97-1.00) | 0.93 (0.85-1.00) | 1.00 (0.99-1.00) | 0.88 (0.613-1.00) | 0.99 (0.97-1.00) | 0.997 (0.986-1.000) |
| 0.95 | 4 | 0.5  | 1.00 (1.00-1.00) | 1.00 (1.00-1.00) | 1.00 (1.00-1.00) | 1.00 (0.963-1.00) | 1.00 (1.00-1.00) | 1.000 (1.000-1.000) |
| 0.95 | 4 | 0.9  | 1.00 (1.00-1.00) | 1.00 (1.00-1.00) | 1.00 (1.00-1.00) | 1.00 (1.000-1.00) | 1.00 (1.00-1.00) | 1.000 (1.000-1.000) |
| 0.95 | 5 | 0    | 0.90 (0.83-0.94) | 0.24 (0.15-0.35) | 0.96 (0.95-0.96) | 0.11 (0.073-0.16) | 0.86 (0.80-0.90) | 0.664 (0.594-0.734) |
| 0.95 | 5 | 0.01 | 0.90 (0.86-0.95) | 0.28 (0.18-0.38) | 0.96 (0.95-0.97) | 0.14 (0.086-0.22) | 0.87 (0.83-0.91) | 0.714 (0.634-0.808) |
| 0.95 | 5 | 0.05 | 0.94 (0.90-0.98) | 0.45 (0.31-0.62) | 0.97 (0.96-0.98) | 0.32 (0.159-0.56) | 0.92 (0.88-0.96) | 0.860 (0.773-0.939) |
| 0.95 | 5 | 0.1  | 0.97 (0.93-0.99) | 0.64 (0.46-0.85) | 0.98 (0.97-0.99) | 0.59 (0.282-0.86) | 0.98 (0.91-0.98) | 0.951 (0.860-0.994) |
| 0.95 | 5 | 0.2  | 0.99 (0.97-1.00) | 0.89 (0.77-0.98) | 0.99 (0.99-1.00) | 0.86 (0.630-0.97) | 0.99 (0.97-1.00) | 0.994 (0.975-1.000) |
| 0.95 | 5 | 0.5  | 1.00 (1.00-1.00) | 1.00 (1.00-1.00) | 1.00 (1.00-1.00) | 1.00 (0.963-1.00) | 1.00 (1.00-1.00) | 1.000 (1.000-1.000) |
| 0.95 | 5 | 0.9  | 1.00 (1.00-1.00) | 1.00 (1.00-1.00) | 1.00 (1.00-1.00) | 1.00 (1.000-1.00) | 1.00 (1.00-1.00) | 1.000 (1.000-1.000) |

Weak gene expression changes (1.4-fold)

| Proportion of resistant cases | Number of resistance mechanisms | Overlap | Sensitivity      | Specificity       | PPV              | NPV                 | Accuracy         | AUC                 |
|-------------------------------|---------------------------------|---------|------------------|-------------------|------------------|---------------------|------------------|---------------------|
| 0.5                           | 2                               | 0       | 0.91 (0.88-0.94) | 0.92 (0.879-0.95) | 0.92 (0.88-0.95) | 0.909 (0.879-0.940) | 0.91 (0.88-0.94) | 0.969 (0.943-0.984) |
| 0.5                           | 2                               | 0.01    | 0.91 (0.87-0.94) | 0.92 (0.887-0.95) | 0.92 (0.89-0.95) | 0.910 (0.876-0.942) | 0.92 (0.88-0.94) | 0.970 (0.948-0.986) |
| 0.5                           | 2                               | 0.05    | 0.92 (0.88-0.95) | 0.93 (0.891-0.97) | 0.93 (0.89-0.96) | 0.921 (0.885-0.950) | 0.93 (0.89-0.96) | 0.976 (0.956-0.989) |
| 0.5                           | 2                               | 0.1     | 0.93 (0.90-0.96) | 0.94 (0.901-0.97) | 0.94 (0.90-0.97) | 0.931 (0.900-0.957) | 0.94 (0.90-0.96) | 0.981 (0.963-0.992) |
| 0.5                           | 2                               | 0.2     | 0.94 (0.90-0.97) | 0.95 (0.915-0.98) | 0.95 (0.91-0.98) | 0.943 (0.903-0.969) | 0.95 (0.91-0.97) | 0.986 (0.966-0.996) |
| 0.5                           | 2                               | 0.5     | 0.97 (0.94-0.99) | 0.98 (0.950-1.00) | 0.98 (0.95-1.00) | 0.968 (0.942-0.987) | 0.97 (0.94-0.99) | 0.996 (0.987-1.000) |
| 0.5                           | 2                               | 0.9     | 0.98 (0.96-1.00) | 0.99 (0.970-1.00) | 0.99 (0.97-1.00) | 0.983 (0.964-0.996) | 0.99 (0.97-1.00) | 0.999 (0.995-1.000) |
| 0.5                           | 3                               | 0       | 0.82 (0.78-0.86) | 0.82 (0.780-0.86) | 0.82 (0.78-0.86) | 0.824 (0.781-0.866) | 0.82 (0.78-0.86) | 0.897 (0.857-0.925) |
| 0.5                           | 3                               | 0.01    | 0.83 (0.78-0.87) | 0.83 (0.766-0.88) | 0.83 (0.77-0.88) | 0.830 (0.780-0.871) | 0.83 (0.78-0.87) | 0.903 (0.851-0.935) |
| 0.5                           | 3                               | 0.05    | 0.85 (0.81-0.89) | 0.86 (0.811-0.91) | 0.86 (0.81-0.90) | 0.856 (0.808-0.894) | 0.86 (0.81-0.90) | 0.927 (0.883-0.960) |
| 0.5                           | 3                               | 0.1     | 0.88 (0.84-0.92) | 0.89 (0.841-0.93) | 0.88 (0.84-0.93) | 0.879 (0.841-0.918) | 0.88 (0.84-0.92) | 0.947 (0.910-0.970) |
| 0.5                           | 3                               | 0.2     | 0.91 (0.87-0.95) | 0.92 (0.877-0.96) | 0.92 (0.88-0.96) | 0.915 (0.871-0.950) | 0.92 (0.87-0.95) | 0.971 (0.940-0.987) |
| 0.5                           | 3                               | 0.5     | 0.96 (0.93-0.99) | 0.97 (0.932-0.99) | 0.97 (0.93-0.99) | 0.963 (0.928-0.986) | 0.97 (0.93-0.99) | 0.994 (0.980-0.999) |
| 0.5                           | 3                               | 0.9     | 0.98 (0.96-1.00) | 0.99 (0.961-1.00) | 0.99 (0.96-1.00) | 0.983 (0.961-0.996) | 0.99 (0.96-1.00) | 0.999 (0.993-1.000) |
| 0.5                           | 4                               | 0       | 0.74 (0.70-0.79) | 0.74 (0.683-0.78) | 0.74 (0.69-0.78) | 0.741 (0.700-0.783) | 0.74 (0.70-0.78) | 0.810 (0.764-0.847) |
| 0.5                           | 4                               | 0.01    | 0.76 (0.71-0.80) | 0.75 (0.688-0.80) | 0.75 (0.70-0.80) | 0.755 (0.703-0.801) | 0.75 (0.70-0.80) | 0.827 (0.755-0.870) |
| 0.5                           | 4                               | 0.05    | 0.80 (0.75-0.86) | 0.80 (0.744-0.85) | 0.80 (0.75-0.85) | 0.798 (0.743-0.854) | 0.80 (0.75-0.85) | 0.874 (0.817-0.925) |
| 0.5                           | 4                               | 0.1     | 0.84 (0.80-0.89) | 0.84 (0.788-0.90) | 0.84 (0.79-0.89) | 0.842 (0.795-0.887) | 0.84 (0.80-0.89) | 0.915 (0.870-0.951) |
| 0.5                           | 4                               | 0.2     | 0.90 (0.86-0.93) | 0.90 (0.851-0.95) | 0.90 (0.85-0.95) | 0.896 (0.854-0.933) | 0.90 (0.85-0.94) | 0.959 (0.925-0.982) |
| 0.5                           | 4                               | 0.5     | 0.96 (0.93-0.98) | 0.97 (0.928-0.99) | 0.97 (0.93-0.99) | 0.961 (0.927-0.985) | 0.97 (0.93-0.98) | 0.993 (0.980-0.999) |
| 0.5                           | 4                               | 0.9     | 0.98 (0.97-1.00) | 0.99 (0.967-1.00) | 0.99 (0.97-1.00) | 0.982 (0.966-0.996) | 0.99 (0.97-1.00) | 0.999 (0.995-1.000) |
| 0.5                           | 5                               | 0       | 0.67 (0.62-0.71) | 0.66 (0.616-0.70) | 0.67 (0.63-0.71) | 0.669 (0.625-0.706) | 0.67 (0.62-0.70) | 0.724 (0.674-0.763) |
| 0.5                           | 5                               | 0.01    | 0.69 (0.65-0.74) | 0.68 (0.635-0.73) | 0.69 (0.64-0.73) | 0.690 (0.646-0.736) | 0.69 (0.65-0.73) | 0.751 (0.692-0.804) |
| 0.5                           | 5                               | 0.05    | 0.75 (0.67-0.82) | 0.75 (0.680-0.81) | 0.75 (0.69-0.81) | 0.749 (0.676-0.818) | 0.75 (0.68-0.81) | 0.821 (0.751-0.891) |
| 0.5                           | 5                               | 0.1     | 0.81 (0.75-0.86) | 0.81 (0.738-0.86) | 0.81 (0.75-0.86) | 0.808 (0.753-0.859) | 0.81 (0.75-0.86) | 0.882 (0.821-0.931) |
| 0.5                           | 5                               | 0.2     | 0.88 (0.83-0.92) | 0.89 (0.834-0.93) | 0.89 (0.84-0.93) | 0.884 (0.837-0.923) | 0.89 (0.84-0.92) | 0.950 (0.914-0.976) |
| 0.5                           | 5                               | 0.5     | 0.96 (0.92-0.98) | 0.97 (0.924-0.99) | 0.97 (0.92-0.99) | 0.961 (0.920-0.984) | 0.96 (0.92-0.99) | 0.993 (0.978-0.999) |
| 0.5                           | 5                               | 0.9     | 0.98 (0.96-1.00) | 0.99 (0.969-1.00) | 0.99 (0.97-1.00) | 0.983 (0.964-0.996) | 0.99 (0.97-1.00) | 0.999 (0.995-1.000) |
| 0.6                           | 2                               | 0       | 0.92 (0.89-0.94) | 0.91 (0.878-0.95) | 0.94 (0.92-0.96) | 0.883 (0.844-0.911) | 0.92 (0.89-0.94) | 0.970 (0.950-0.982) |
| 0.6                           | 2                               | 0.01    | 0.92 (0.88-0.94) | 0.91 (0.862-0.94) | 0.94 (0.91-0.96) | 0.880 (0.830-0.916) | 0.91 (0.87-0.94) | 0.969 (0.940-0.984) |
| 0.6                           | 2                               | 0.05    | 0.92 (0.89-0.95) | 0.92 (0.867-0.96) | 0.94 (0.91-0.97) | 0.889 (0.838-0.935) | 0.92 (0.88-0.96) | 0.973 (0.945-0.990) |
| 0.6                           | 2                               | 0.1     | 0.94 (0.90-0.96) | 0.93 (0.883-0.97) | 0.95 (0.92-0.98) | 0.909 (0.855-0.945) | 0.94 (0.90-0.96) | 0.981 (0.959-0.993) |
| 0.6                           | 2                               | 0.2     | 0.95 (0.91-0.97) | 0.95 (0.912-0.98) | 0.96 (0.94-0.99) | 0.923 (0.877-0.958) | 0.95 (0.91-0.97) | 0.987 (0.968-0.996) |
| 0.6                           | 2                               | 0.5     | 0.97 (0.93-0.99) | 0.97 (0.944-1.00) | 0.98 (0.96-1.00) | 0.954 (0.904-0.984) | 0.97 (0.94-0.99) | 0.995 (0.985-0.999) |
| 0.6                           | 2                               | 0.9     | 0.98 (0.97-1.00) | 0.99 (0.966-1.00) | 0.99 (0.98-1.00) | 0.975 (0.953-0.995) | 0.99 (0.97-1.00) | 0.999 (0.995-1.000) |
| 0.6                           | 3                               | 0       | 0.84 (0.80-0.87) | 0.79 (0.750-0.83) | 0.86 (0.82-0.88) | 0.771 (0.708-0.811) | 0.82 (0.77-0.85) | 0.895 (0.840-0.921) |
| 0.6                           | 3                               | 0.01    | 0.85 (0.80-0.88) | 0.80 (0.748-0.85) | 0.86 (0.83-0.89) | 0.776 (0.711-0.827) | 0.83 (0.78-0.87) | 0.899 (0.847-0.930) |
| 0.6                           | 3                               | 0.05    | 0.87 (0.83-0.91) | 0.83 (0.784-0.89) | 0.89 (0.85-0.92) | 0.809 (0.759-0.861) | 0.85 (0.81-0.89) | 0.924 (0.883-0.955) |
| 0.6                           | 3                               | 0.1     | 0.90 (0.87-0.93) | 0.87 (0.821-0.91) | 0.91 (0.88-0.94) | 0.848 (0.803-0.891) | 0.89 (0.85-0.92) | 0.949 (0.922-0.972) |
| 0.6                           | 3                               | 0.2     | 0.92 (0.88-0.95) | 0.91 (0.861-0.96) | 0.94 (0.91-0.97) | 0.890 (0.828-0.931) | 0.92 (0.87-0.96) | 0.972 (0.940-0.988) |
| 0.6                           | 3                               | 0.5     | 0.97 (0.94-0.99) | 0.97 (0.932-0.99) | 0.98 (0.95-1.00) | 0.951 (0.907-0.979) | 0.97 (0.94-0.99) | 0.994 (0.984-0.999) |
| 0.6                           | 3                               | 0.9     | 0.98 (0.97-1.00) | 0.99 (0.964-1.00) | 0.99 (0.98-1.00) | 0.976 (0.951-0.995) | 0.99 (0.97-1.00) | 0.999 (0.995-1.000) |
| 0.6                           | 4                               | 0       | 0.77 (0.72-0.80) | 0.69 (0.647-0.73) | 0.79 (0.76-0.81) | 0.669 (0.608-0.710) | 0.74 (0.69-0.77) | 0.803 (0.742-0.841) |
| 0.6                           | 4                               | 0.01    | 0.79 (0.73-0.83) | 0.71 (0.654-0.75) | 0.80 (0.76-0.83) | 0.689 (0.621-0.745) | 0.76 (0.70-0.80) | 0.821 (0.753-0.866) |
| 0.6                           | 4                               | 0.05    | 0.82 (0.76-0.87) | 0.76 (0.691-0.82) | 0.84 (0.79-0.88) | 0.744 (0.670-0.811) | 0.80 (0.74-0.85) | 0.870 (0.809-0.919) |
| 0.6                           | 4                               | 0.1     | 0.86 (0.82-0.90) | 0.82 (0.763-0.87) | 0.88 (0.84-0.91) | 0.801 (0.738-0.853) | 0.84 (0.80-0.89) | 0.915 (0.866-0.952) |
| 0.6                           | 4                               | 0.2     | 0.91 (0.85-0.94) | 0.88 (0.817-0.93) | 0.92 (0.88-0.95) | 0.865 (0.788-0.917) | 0.90 (0.84-0.94) | 0.957 (0.912-0.980) |
| 0.6                           | 4                               | 0.5     | 0.97 (0.93-0.99) | 0.97 (0.926-0.99) | 0.98 (0.95-0.99) | 0.950 (0.895-0.981) | 0.97 (0.93-0.99) | 0.994 (0.981-0.999) |
| 0.6                           | 4                               | 0.9     | 0.98 (0.96-1.00) | 0.99 (0.966-1.00) | 0.99 (0.98-1.00) | 0.976 (0.943-0.995) | 0.99 (0.96-1.00) | 0.999 (0.995-1.000) |
| 0.6                           | 5                               | 0       | 0.71 (0.66-0.75) | 0.61 (0.568-0.65) | 0.73 (0.70-0.76) | 0.586 (0.536-0.627) | 0.67 (0.63-0.71) | 0.718 (0.670-0.757) |
| 0.6                           | 5                               | 0.01    | 0.73 (0.66-0.78) | 0.63 (0.578-0.67) | 0.75 (0.71-0.78) | 0.613 (0.539-0.663) | 0.69 (0.63-0.74) | 0.745 (0.660-0.795) |
| 0.6                           | 5                               | 0.05    | 0.78 (0.72-0.83) | 0.70 (0.624-0.76) | 0.79 (0.75-0.84) | 0.680 (0.600-0.747) | 0.75 (0.68-0.80) | 0.811 (0.746-0.869) |
| 0.6                           | 5                               | 0.1     | 0.83 (0.78-0.89) | 0.77 (0.708-0.85) | 0.85 (0.80-0.90) | 0.757 (0.680-0.839) | 0.81 (0.75-0.87) | 0.881 (0.819-0.939) |
| 0.6                           | 5                               | 0.2     | 0.89 (0.83-0.94) | 0.86 (0.789-0.91) | 0.90 (0.85-0.94) | 0.842 (0.765-0.902) | 0.88 (0.82-0.93) | 0.943 (0.888-0.974) |
| 0.6                           | 5                               | 0.5     | 0.96 (0.93-0.98) | 0.97 (0.923-0.99) | 0.98 (0.95-0.99) | 0.948 (0.896-0.976) | 0.96 (0.93-0.99) | 0.993 (0.977-0.999) |
| 0.6                           | 5                               | 0.9     | 0.98 (0.96-1.00) | 0.99 (0.961-1.00) | 0.99 (0.97-1.00) | 0.976 (0.945-0.995) | 0.99 (0.96-1.00) | 0.999 (0.994-1.000) |

Supplementary Table S7  
Page 4

|     |   |      |                  |                   |                  |                     |                  |                     |
|-----|---|------|------------------|-------------------|------------------|---------------------|------------------|---------------------|
| 0.7 | 2 | 0    | 0.93 (0.89-0.96) | 0.89 (0.845-0.94) | 0.95 (0.93-0.97) | 0.842 (0.773-0.895) | 0.92 (0.88-0.94) | 0.968 (0.942-0.983) |
| 0.7 | 2 | 0.01 | 0.93 (0.90-0.96) | 0.90 (0.852-0.93) | 0.95 (0.93-0.97) | 0.845 (0.787-0.902) | 0.92 (0.89-0.95) | 0.970 (0.951-0.985) |
| 0.7 | 2 | 0.05 | 0.93 (0.89-0.96) | 0.90 (0.843-0.95) | 0.96 (0.93-0.98) | 0.854 (0.766-0.917) | 0.92 (0.88-0.96) | 0.974 (0.943-0.990) |
| 0.7 | 2 | 0.1  | 0.94 (0.90-0.97) | 0.92 (0.873-0.95) | 0.97 (0.94-0.98) | 0.870 (0.796-0.922) | 0.93 (0.89-0.96) | 0.980 (0.958-0.990) |
| 0.7 | 2 | 0.2  | 0.96 (0.92-0.98) | 0.94 (0.898-0.97) | 0.98 (0.95-0.99) | 0.901 (0.824-0.947) | 0.95 (0.91-0.97) | 0.988 (0.967-0.996) |
| 0.7 | 2 | 0.5  | 0.97 (0.95-0.99) | 0.97 (0.934-1.00) | 0.99 (0.97-1.00) | 0.941 (0.883-0.975) | 0.97 (0.94-0.99) | 0.996 (0.986-0.999) |
| 0.7 | 2 | 0.9  | 0.98 (0.97-0.99) | 0.99 (0.961-1.00) | 0.99 (0.98-1.00) | 0.963 (0.925-0.987) | 0.98 (0.97-1.00) | 0.999 (0.995-1.000) |
| 0.7 | 3 | 0    | 0.86 (0.81-0.90) | 0.75 (0.702-0.79) | 0.89 (0.87-0.91) | 0.697 (0.626-0.763) | 0.83 (0.79-0.86) | 0.888 (0.835-0.920) |
| 0.7 | 3 | 0.01 | 0.87 (0.83-0.90) | 0.76 (0.718-0.81) | 0.90 (0.87-0.92) | 0.713 (0.652-0.770) | 0.84 (0.80-0.87) | 0.898 (0.859-0.930) |
| 0.7 | 3 | 0.05 | 0.89 (0.85-0.92) | 0.80 (0.745-0.86) | 0.91 (0.89-0.94) | 0.752 (0.678-0.823) | 0.86 (0.82-0.90) | 0.921 (0.878-0.958) |
| 0.7 | 3 | 0.1  | 0.90 (0.86-0.94) | 0.84 (0.774-0.90) | 0.93 (0.90-0.95) | 0.785 (0.699-0.860) | 0.88 (0.83-0.92) | 0.942 (0.895-0.968) |
| 0.7 | 3 | 0.2  | 0.93 (0.89-0.96) | 0.90 (0.837-0.94) | 0.96 (0.93-0.97) | 0.854 (0.766-0.914) | 0.92 (0.88-0.96) | 0.972 (0.939-0.990) |
| 0.7 | 3 | 0.5  | 0.97 (0.94-0.99) | 0.96 (0.923-0.99) | 0.98 (0.97-1.00) | 0.931 (0.874-0.968) | 0.97 (0.94-0.99) | 0.994 (0.982-0.999) |
| 0.7 | 3 | 0.9  | 0.98 (0.97-1.00) | 0.99 (0.961-1.00) | 0.99 (0.98-1.00) | 0.962 (0.925-0.991) | 0.98 (0.96-1.00) | 0.998 (0.993-1.000) |
| 0.7 | 4 | 0    | 0.80 (0.75-0.84) | 0.62 (0.573-0.67) | 0.83 (0.81-0.85) | 0.577 (0.505-0.641) | 0.75 (0.70-0.78) | 0.793 (0.745-0.835) |
| 0.7 | 4 | 0.01 | 0.81 (0.77-0.85) | 0.64 (0.592-0.69) | 0.84 (0.82-0.87) | 0.587 (0.531-0.663) | 0.76 (0.72-0.80) | 0.802 (0.758-0.857) |
| 0.7 | 4 | 0.05 | 0.84 (0.78-0.89) | 0.70 (0.622-0.77) | 0.87 (0.83-0.90) | 0.656 (0.558-0.745) | 0.80 (0.74-0.85) | 0.857 (0.791-0.909) |
| 0.7 | 4 | 0.1  | 0.87 (0.80-0.91) | 0.76 (0.675-0.83) | 0.89 (0.85-0.93) | 0.715 (0.605-0.801) | 0.84 (0.77-0.88) | 0.897 (0.821-0.942) |
| 0.7 | 4 | 0.2  | 0.92 (0.87-0.95) | 0.85 (0.776-0.92) | 0.94 (0.90-0.96) | 0.818 (0.715-0.893) | 0.90 (0.84-0.94) | 0.954 (0.903-0.984) |
| 0.7 | 4 | 0.5  | 0.97 (0.93-0.99) | 0.96 (0.916-0.98) | 0.98 (0.96-0.99) | 0.924 (0.857-0.968) | 0.96 (0.93-0.98) | 0.992 (0.974-0.998) |
| 0.7 | 4 | 0.9  | 0.98 (0.97-0.99) | 0.99 (0.964-1.00) | 0.99 (0.98-1.00) | 0.965 (0.922-0.987) | 0.99 (0.97-1.00) | 0.999 (0.994-1.000) |
| 0.7 | 5 | 0    | 0.75 (0.70-0.79) | 0.53 (0.477-0.58) | 0.79 (0.77-0.81) | 0.473 (0.425-0.519) | 0.68 (0.65-0.71) | 0.697 (0.652-0.749) |
| 0.7 | 5 | 0.01 | 0.76 (0.70-0.81) | 0.55 (0.495-0.60) | 0.80 (0.77-0.82) | 0.494 (0.435-0.563) | 0.70 (0.65-0.74) | 0.716 (0.661-0.777) |
| 0.7 | 5 | 0.05 | 0.80 (0.73-0.86) | 0.62 (0.561-0.71) | 0.83 (0.80-0.87) | 0.580 (0.477-0.672) | 0.75 (0.68-0.80) | 0.793 (0.720-0.861) |
| 0.7 | 5 | 0.1  | 0.84 (0.76-0.89) | 0.70 (0.622-0.77) | 0.87 (0.83-0.90) | 0.660 (0.531-0.754) | 0.80 (0.72-0.85) | 0.857 (0.767-0.917) |
| 0.7 | 5 | 0.2  | 0.90 (0.85-0.95) | 0.82 (0.745-0.89) | 0.92 (0.89-0.95) | 0.786 (0.677-0.874) | 0.88 (0.82-0.93) | 0.935 (0.880-0.976) |
| 0.7 | 5 | 0.5  | 0.97 (0.92-0.99) | 0.95 (0.903-0.98) | 0.98 (0.96-0.99) | 0.924 (0.836-0.968) | 0.96 (0.92-0.98) | 0.991 (0.968-0.998) |
| 0.7 | 5 | 0.9  | 0.98 (0.97-0.99) | 0.99 (0.964-1.00) | 0.99 (0.98-1.00) | 0.966 (0.928-0.987) | 0.99 (0.97-1.00) | 0.999 (0.995-1.000) |
| 0.8 | 2 | 0    | 0.94 (0.90-0.96) | 0.86 (0.808-0.90) | 0.96 (0.95-0.98) | 0.775 (0.676-0.851) | 0.92 (0.89-0.95) | 0.966 (0.935-0.982) |
| 0.8 | 2 | 0.01 | 0.94 (0.91-0.96) | 0.86 (0.798-0.91) | 0.97 (0.95-0.98) | 0.771 (0.690-0.857) | 0.92 (0.89-0.95) | 0.966 (0.940-0.984) |
| 0.8 | 2 | 0.05 | 0.94 (0.91-0.97) | 0.88 (0.820-0.94) | 0.97 (0.95-0.98) | 0.789 (0.689-0.881) | 0.93 (0.89-0.96) | 0.971 (0.942-0.989) |
| 0.8 | 2 | 0.1  | 0.95 (0.91-0.97) | 0.90 (0.835-0.94) | 0.97 (0.96-0.99) | 0.816 (0.710-0.888) | 0.94 (0.90-0.96) | 0.978 (0.950-0.992) |
| 0.8 | 2 | 0.2  | 0.96 (0.93-0.98) | 0.93 (0.874-0.96) | 0.98 (0.97-0.99) | 0.850 (0.765-0.922) | 0.95 (0.92-0.98) | 0.986 (0.970-0.995) |
| 0.8 | 2 | 0.5  | 0.98 (0.95-0.99) | 0.97 (0.932-0.99) | 0.99 (0.98-1.00) | 0.915 (0.827-0.967) | 0.98 (0.95-0.99) | 0.996 (0.986-0.999) |
| 0.8 | 2 | 0.9  | 0.99 (0.97-1.00) | 0.99 (0.956-1.00) | 1.00 (0.99-1.00) | 0.947 (0.879-0.990) | 0.99 (0.97-1.00) | 0.999 (0.994-1.000) |
| 0.8 | 3 | 0    | 0.88 (0.83-0.91) | 0.67 (0.616-0.72) | 0.91 (0.90-0.93) | 0.585 (0.469-0.671) | 0.84 (0.78-0.87) | 0.872 (0.815-0.911) |
| 0.8 | 3 | 0.01 | 0.88 (0.83-0.92) | 0.68 (0.631-0.75) | 0.92 (0.90-0.93) | 0.592 (0.486-0.699) | 0.84 (0.79-0.88) | 0.879 (0.823-0.925) |
| 0.8 | 3 | 0.05 | 0.90 (0.85-0.93) | 0.73 (0.650-0.80) | 0.93 (0.91-0.95) | 0.645 (0.532-0.740) | 0.87 (0.82-0.90) | 0.906 (0.852-0.947) |
| 0.8 | 3 | 0.1  | 0.91 (0.85-0.94) | 0.78 (0.694-0.84) | 0.94 (0.92-0.96) | 0.693 (0.533-0.789) | 0.89 (0.82-0.92) | 0.930 (0.867-0.964) |
| 0.8 | 3 | 0.2  | 0.94 (0.90-0.97) | 0.86 (0.796-0.91) | 0.96 (0.95-0.98) | 0.784 (0.666-0.870) | 0.92 (0.88-0.95) | 0.966 (0.929-0.986) |
| 0.8 | 3 | 0.5  | 0.97 (0.94-0.99) | 0.95 (0.905-0.98) | 0.99 (0.98-1.00) | 0.899 (0.796-0.953) | 0.97 (0.94-0.99) | 0.994 (0.979-0.999) |
| 0.8 | 3 | 0.9  | 0.99 (0.97-1.00) | 0.99 (0.961-1.00) | 1.00 (0.99-1.00) | 0.948 (0.897-0.988) | 0.99 (0.97-1.00) | 0.999 (0.996-1.000) |
| 0.8 | 4 | 0    | 0.82 (0.75-0.87) | 0.50 (0.442-0.56) | 0.87 (0.85-0.88) | 0.414 (0.328-0.492) | 0.76 (0.70-0.80) | 0.745 (0.683-0.800) |
| 0.8 | 4 | 0.01 | 0.82 (0.76-0.88) | 0.52 (0.459-0.59) | 0.87 (0.86-0.89) | 0.429 (0.352-0.541) | 0.76 (0.72-0.82) | 0.759 (0.697-0.828) |
| 0.8 | 4 | 0.05 | 0.86 (0.80-0.91) | 0.61 (0.529-0.70) | 0.90 (0.87-0.92) | 0.528 (0.413-0.648) | 0.81 (0.75-0.86) | 0.832 (0.754-0.897) |
| 0.8 | 4 | 0.1  | 0.88 (0.80-0.93) | 0.67 (0.583-0.75) | 0.91 (0.89-0.93) | 0.590 (0.444-0.716) | 0.84 (0.77-0.89) | 0.872 (0.793-0.931) |
| 0.8 | 4 | 0.2  | 0.93 (0.89-0.96) | 0.79 (0.721-0.87) | 0.95 (0.93-0.97) | 0.738 (0.617-0.839) | 0.90 (0.86-0.94) | 0.946 (0.899-0.977) |
| 0.8 | 4 | 0.5  | 0.97 (0.95-0.99) | 0.94 (0.883-0.98) | 0.99 (0.97-1.00) | 0.896 (0.799-0.953) | 0.97 (0.93-0.99) | 0.992 (0.975-0.998) |
| 0.8 | 4 | 0.9  | 0.99 (0.97-1.00) | 0.99 (0.961-1.00) | 1.00 (0.99-1.00) | 0.949 (0.899-0.981) | 0.99 (0.97-1.00) | 0.999 (0.996-1.000) |
| 0.8 | 5 | 0    | 0.77 (0.70-0.82) | 0.41 (0.339-0.47) | 0.84 (0.83-0.85) | 0.312 (0.270-0.364) | 0.70 (0.66-0.74) | 0.646 (0.600-0.692) |
| 0.8 | 5 | 0.01 | 0.78 (0.72-0.84) | 0.44 (0.362-0.50) | 0.85 (0.83-0.87) | 0.336 (0.288-0.422) | 0.71 (0.67-0.77) | 0.673 (0.627-0.749) |
| 0.8 | 5 | 0.05 | 0.83 (0.76-0.88) | 0.52 (0.442-0.61) | 0.87 (0.85-0.90) | 0.429 (0.338-0.551) | 0.76 (0.71-0.82) | 0.756 (0.678-0.842) |
| 0.8 | 5 | 0.1  | 0.86 (0.79-0.91) | 0.59 (0.519-0.68) | 0.89 (0.87-0.92) | 0.514 (0.396-0.657) | 0.80 (0.75-0.86) | 0.820 (0.730-0.896) |
| 0.8 | 5 | 0.2  | 0.91 (0.85-0.95) | 0.75 (0.643-0.82) | 0.94 (0.91-0.96) | 0.689 (0.514-0.805) | 0.88 (0.81-0.92) | 0.922 (0.843-0.963) |
| 0.8 | 5 | 0.5  | 0.97 (0.93-0.99) | 0.93 (0.871-0.98) | 0.98 (0.97-0.99) | 0.891 (0.766-0.957) | 0.96 (0.92-0.99) | 0.990 (0.965-0.998) |
| 0.8 | 5 | 0.9  | 0.99 (0.97-1.00) | 0.98 (0.961-1.00) | 1.00 (0.99-1.00) | 0.945 (0.892-0.981) | 0.99 (0.97-1.00) | 0.999 (0.996-1.000) |
| 0.9 | 2 | 0    | 0.94 (0.90-0.97) | 0.72 (0.639-0.81) | 0.97 (0.96-0.98) | 0.594 (0.444-0.725) | 0.92 (0.88-0.95) | 0.941 (0.888-0.969) |
| 0.9 | 2 | 0.01 | 0.94 (0.90-0.97) | 0.72 (0.601-0.81) | 0.97 (0.95-0.98) | 0.591 (0.418-0.725) | 0.92 (0.87-0.95) | 0.939 (0.877-0.972) |
| 0.9 | 2 | 0.05 | 0.95 (0.91-0.97) | 0.76 (0.654-0.84) | 0.97 (0.96-0.98) | 0.635 (0.441-0.767) | 0.93 (0.88-0.96) | 0.952 (0.892-0.978) |
| 0.9 | 2 | 0.1  | 0.96 (0.92-0.98) | 0.80 (0.692-0.88) | 0.98 (0.96-0.99) | 0.674 (0.487-0.815) | 0.94 (0.90-0.97) | 0.964 (0.919-0.987) |
| 0.9 | 2 | 0.2  | 0.96 (0.93-0.98) | 0.84 (0.750-0.92) | 0.98 (0.97-0.99) | 0.732 (0.559-0.852) | 0.95 (0.92-0.97) | 0.976 (0.945-0.992) |
| 0.9 | 2 | 0.5  | 0.98 (0.96-0.99) | 0.94 (0.875-0.98) | 0.99 (0.99-1.00) | 0.845 (0.693-0.952) | 0.98 (0.95-0.99) | 0.994 (0.980-0.999) |
| 0.9 | 2 | 0.9  | 0.99 (0.97-1.00) | 0.98 (0.942-1.00) | 1.00 (0.99-1.00) | 0.908 (0.811-0.972) | 0.99 (0.97-1.00) | 0.998 (0.995-1.000) |
| 0.9 | 3 | 0    | 0.87 (0.80-0.92) | 0.41 (0.327-0.48) | 0.93 (0.92-0.94) | 0.271 (0.188-0.354) | 0.83 (0.77-0.86) | 0.752 (0.674-0.812) |
| 0.9 | 3 | 0.01 | 0.87 (0.80-0.92) | 0.42 (0.327-0.50) | 0.93 (0.92-0.94) | 0.279 (0.194-0.378) | 0.83 (0.77-0.87) | 0.757 (0.687-0.823) |
| 0.9 | 3 | 0.05 | 0.89 (0.83-0.94) | 0.48 (0.404-0.57) | 0.94 (0.93-0.95) | 0.348 (0.230-0.452) | 0.85 (0.79-0.89) | 0.813 (0.726-0.878) |
| 0.9 | 3 | 0.1  | 0.91 (0.84-0.95) | 0.54 (0.462-0.65) | 0.95 (0.94-0.96) | 0.425 (0.264-0.570) | 0.88 (0.81-0.91) | 0.859 (0.767-0.922) |
| 0.9 | 3 | 0.2  | 0.94 (0.89-0.97) | 0.67 (0.558-0.78) | 0.96 (0.95-0.97) | 0.559 (0.362-0.721) | 0.91 (0.86-0.95) | 0.919 (0.842-0.969) |
| 0.9 | 3 | 0.5  | 0.98 (0.95-0.99) | 0.90 (0.826-0.94) | 0.99 (0.98-0.99) | 0.824 (0.672-0.922) | 0.97 (0.94-0.98) | 0.989 (0.969-0.997) |
| 0.9 | 3 | 0.9  | 0.99 (0.97-1.00) | 0.98 (0.942-1.00) | 1.00 (0.99-1.00) | 0.901 (0.777-0.981) | 0.99 (0.97-1.00) | 0.998 (0.991-1.000) |
| 0.9 | 4 | 0    | 0.83 (0.76-0.88) | 0.30 (0.231-0.38) | 0.91 (0.91-0.92) | 0.163 (0.129-0.197) | 0.77 (0.72-0.82) | 0.623 (0.579-0.670) |
| 0.9 | 4 | 0.01 | 0.83 (0.77-0.89) | 0.31 (0.206-0.40) | 0.92 (0.91-0.92) | 0.174 (0.140-0.219) | 0.78 (0.74-0.82) | 0.638 (0.585-0.700) |
| 0.9 | 4 | 0.05 | 0.86 (0.80-0.91) | 0.37 (0.278-0.48) | 0.92 (0.91-0.93) | 0.235 (0.172-0.307) | 0.81 (0.76-0.85) | 0.710 (0.636-0.774) |
| 0.9 | 4 | 0.1  | 0.89 (0.83-0.93) | 0.43 (0.341-0.53) | 0.93 (0.92-0.95) | 0.305 (0.204-0.441) | 0.84 (0.78-0.88) | 0.774 (0.695-0.857) |
| 0.9 | 4 | 0.2  | 0.92 (0.85-0.96) | 0.57 (0.481-0.66) | 0.95 (0.94-0.96) | 0.471 (0.272-0.638) | 0.89 (0.81-0.93) | 0.876 (0.777-0.939) |
| 0.9 | 4 | 0.5  | 0.98 (0.95-0.99) | 0.87 (0.803-0.94) | 0.99 (0.98-0.99) | 0.813 (0.666-0.926) | 0.97 (0.94-0.99) | 0.986 (0.964-0.997) |
| 0.9 | 4 | 0.9  | 0.99 (0.97-1.00) | 0.97 (0.942-1.00) | 1.00 (0.99-1.00) | 0.904 (0.758-0.981) | 0.99 (0.96-1.00) | 0.998 (0.990-1.000) |
| 0.9 | 5 | 0    | 0.80 (0.75-0.86) | 0.26 (0.192-0.39) | 0.91 (0.90-0.92) | 0.130 (0.106-0.151) | 0.75 (0.71-0.79) | 0.566 (0.520-0.615) |
| 0.9 | 5 | 0.01 | 0.81 (0.75-0.86) | 0.28 (0.192-0.37) | 0.91 (0.90-0.92) | 0.143 (0.111-0.179) | 0.76 (0.70-0.80) | 0.588 (0.534-0.648) |
| 0.9 | 5 | 0.05 | 0.84 (0.79-0.89) | 0.32 (0.235-0.42) | 0.92 (0.91-0.93) | 0.190 (0.148-0.239) | 0.79 (0.75-0.83) | 0.657 (0.593-0.710) |





Supplementary Table S7  
Page 7

|      |   |      |                  |                  |                  |                  |                  |                     |
|------|---|------|------------------|------------------|------------------|------------------|------------------|---------------------|
| 0.9  | 3 | 0.1  | 1.00 (1.00-1.00) | 1.00 (1.00-1.00) | 1.00 (1.00-1.00) | 0.99 (0.96-1.00) | 1.00 (1.00-1.00) | 1.000 (1.000-1.000) |
| 0.9  | 3 | 0.2  | 1.00 (1.00-1.00) | 1.00 (1.00-1.00) | 1.00 (1.00-1.00) | 1.00 (1.00-1.00) | 1.00 (1.00-1.00) | 1.000 (1.000-1.000) |
| 0.9  | 3 | 0.5  | 1.00 (1.00-1.00) | 1.00 (1.00-1.00) | 1.00 (1.00-1.00) | 1.00 (1.00-1.00) | 1.00 (1.00-1.00) | 1.000 (1.000-1.000) |
| 0.9  | 3 | 0.9  | 1.00 (1.00-1.00) | 1.00 (1.00-1.00) | 1.00 (1.00-1.00) | 1.00 (1.00-1.00) | 1.00 (1.00-1.00) | 1.000 (1.000-1.000) |
| 0.9  | 4 | 0    | 0.97 (0.95-0.99) | 0.90 (0.84-0.96) | 0.99 (0.98-1.00) | 0.81 (0.63-0.90) | 0.97 (0.93-0.98) | 0.988 (0.962-0.996) |
| 0.9  | 4 | 0.01 | 0.98 (0.95-0.99) | 0.94 (0.87-0.99) | 0.99 (0.98-1.00) | 0.86 (0.67-0.95) | 0.98 (0.95-0.99) | 0.994 (0.981-1.000) |
| 0.9  | 4 | 0.05 | 0.99 (0.98-1.00) | 0.99 (0.96-1.00) | 1.00 (1.00-1.00) | 0.95 (0.86-1.00) | 0.99 (0.98-1.00) | 0.999 (0.997-1.000) |
| 0.9  | 4 | 0.1  | 1.00 (0.99-1.00) | 1.00 (0.98-1.00) | 1.00 (1.00-1.00) | 0.99 (0.94-1.00) | 1.00 (0.99-1.00) | 1.000 (0.999-1.000) |
| 0.9  | 4 | 0.2  | 1.00 (1.00-1.00) | 1.00 (1.00-1.00) | 1.00 (1.00-1.00) | 1.00 (0.98-1.00) | 1.00 (1.00-1.00) | 1.000 (1.000-1.000) |
| 0.9  | 4 | 0.5  | 1.00 (1.00-1.00) | 1.00 (1.00-1.00) | 1.00 (1.00-1.00) | 1.00 (1.00-1.00) | 1.00 (1.00-1.00) | 1.000 (1.000-1.000) |
| 0.9  | 4 | 0.9  | 1.00 (1.00-1.00) | 1.00 (1.00-1.00) | 1.00 (1.00-1.00) | 1.00 (1.00-1.00) | 1.00 (1.00-1.00) | 1.000 (1.000-1.000) |
| 0.9  | 5 | 0    | 0.95 (0.92-0.98) | 0.78 (0.71-0.85) | 0.97 (0.97-0.98) | 0.66 (0.50-0.79) | 0.94 (0.90-0.96) | 0.960 (0.916-0.984) |
| 0.9  | 5 | 0.01 | 0.97 (0.91-0.99) | 0.86 (0.76-0.96) | 0.98 (0.97-1.00) | 0.76 (0.51-0.89) | 0.96 (0.90-0.98) | 0.979 (0.942-0.996) |
| 0.9  | 5 | 0.05 | 0.99 (0.97-1.00) | 0.97 (0.90-1.00) | 1.00 (0.99-1.00) | 0.92 (0.80-1.00) | 0.99 (0.97-1.00) | 0.998 (0.989-1.000) |
| 0.9  | 5 | 0.1  | 1.00 (0.99-1.00) | 1.00 (0.98-1.00) | 1.00 (1.00-1.00) | 0.98 (0.90-1.00) | 1.00 (0.99-1.00) | 1.000 (0.999-1.000) |
| 0.9  | 5 | 0.2  | 1.00 (1.00-1.00) | 1.00 (1.00-1.00) | 1.00 (1.00-1.00) | 1.00 (0.98-1.00) | 1.00 (1.00-1.00) | 1.000 (1.000-1.000) |
| 0.9  | 5 | 0.5  | 1.00 (1.00-1.00) | 1.00 (1.00-1.00) | 1.00 (1.00-1.00) | 1.00 (1.00-1.00) | 1.00 (1.00-1.00) | 1.000 (1.000-1.000) |
| 0.9  | 5 | 0.9  | 1.00 (1.00-1.00) | 1.00 (1.00-1.00) | 1.00 (1.00-1.00) | 1.00 (1.00-1.00) | 1.00 (1.00-1.00) | 1.000 (1.000-1.000) |
| 0.95 | 2 | 0    | 1.00 (1.00-1.00) | 1.00 (1.00-1.00) | 1.00 (1.00-1.00) | 0.99 (0.96-1.00) | 1.00 (1.00-1.00) | 1.000 (1.000-1.000) |
| 0.95 | 2 | 0.01 | 1.00 (1.00-1.00) | 1.00 (1.00-1.00) | 1.00 (1.00-1.00) | 0.99 (0.95-1.00) | 1.00 (1.00-1.00) | 1.000 (1.000-1.000) |
| 0.95 | 2 | 0.05 | 1.00 (1.00-1.00) | 1.00 (1.00-1.00) | 1.00 (1.00-1.00) | 1.00 (0.96-1.00) | 1.00 (1.00-1.00) | 1.000 (1.000-1.000) |
| 0.95 | 2 | 0.1  | 1.00 (1.00-1.00) | 1.00 (1.00-1.00) | 1.00 (1.00-1.00) | 1.00 (0.96-1.00) | 1.00 (1.00-1.00) | 1.000 (1.000-1.000) |
| 0.95 | 2 | 0.2  | 1.00 (1.00-1.00) | 1.00 (1.00-1.00) | 1.00 (1.00-1.00) | 1.00 (1.00-1.00) | 1.00 (1.00-1.00) | 1.000 (1.000-1.000) |
| 0.95 | 2 | 0.5  | 1.00 (1.00-1.00) | 1.00 (1.00-1.00) | 1.00 (1.00-1.00) | 1.00 (1.00-1.00) | 1.00 (1.00-1.00) | 1.000 (1.000-1.000) |
| 0.95 | 2 | 0.9  | 1.00 (1.00-1.00) | 1.00 (1.00-1.00) | 1.00 (1.00-1.00) | 1.00 (1.00-1.00) | 1.00 (1.00-1.00) | 1.000 (1.000-1.000) |
| 0.95 | 3 | 0    | 0.99 (0.98-1.00) | 0.94 (0.88-1.00) | 1.00 (0.99-1.00) | 0.85 (0.67-0.96) | 0.99 (0.97-1.00) | 0.997 (0.990-1.000) |
| 0.95 | 3 | 0.01 | 0.99 (0.98-1.00) | 0.96 (0.88-1.00) | 1.00 (0.99-1.00) | 0.89 (0.71-0.96) | 0.99 (0.98-1.00) | 0.998 (0.994-1.000) |
| 0.95 | 3 | 0.05 | 1.00 (0.99-1.00) | 1.00 (0.96-1.00) | 1.00 (1.00-1.00) | 0.96 (0.83-1.00) | 1.00 (0.99-1.00) | 1.000 (0.999-1.000) |
| 0.95 | 3 | 0.1  | 1.00 (0.99-1.00) | 1.00 (1.00-1.00) | 1.00 (1.00-1.00) | 0.98 (0.90-1.00) | 1.00 (0.99-1.00) | 1.000 (1.000-1.000) |
| 0.95 | 3 | 0.2  | 1.00 (1.00-1.00) | 1.00 (1.00-1.00) | 1.00 (1.00-1.00) | 1.00 (1.00-1.00) | 1.00 (1.00-1.00) | 1.000 (1.000-1.000) |
| 0.95 | 3 | 0.5  | 1.00 (1.00-1.00) | 1.00 (1.00-1.00) | 1.00 (1.00-1.00) | 1.00 (1.00-1.00) | 1.00 (1.00-1.00) | 1.000 (1.000-1.000) |
| 0.95 | 3 | 0.9  | 1.00 (1.00-1.00) | 1.00 (1.00-1.00) | 1.00 (1.00-1.00) | 1.00 (1.00-1.00) | 1.00 (1.00-1.00) | 1.000 (1.000-1.000) |
| 0.95 | 4 | 0    | 0.97 (0.94-0.99) | 0.66 (0.54-0.77) | 0.98 (0.98-0.99) | 0.57 (0.32-0.77) | 0.96 (0.92-0.98) | 0.957 (0.904-0.987) |
| 0.95 | 4 | 0.01 | 0.98 (0.94-0.99) | 0.76 (0.59-0.88) | 0.99 (0.98-0.99) | 0.67 (0.38-0.87) | 0.97 (0.93-0.99) | 0.975 (0.921-0.997) |
| 0.95 | 4 | 0.05 | 0.99 (0.97-1.00) | 0.95 (0.85-1.00) | 1.00 (0.99-1.00) | 0.90 (0.63-1.00) | 0.99 (0.97-1.00) | 0.997 (0.985-1.000) |
| 0.95 | 4 | 0.1  | 1.00 (0.99-1.00) | 0.99 (0.93-1.00) | 1.00 (1.00-1.00) | 0.97 (0.86-1.00) | 1.00 (0.99-1.00) | 1.000 (0.998-1.000) |
| 0.95 | 4 | 0.2  | 1.00 (1.00-1.00) | 1.00 (1.00-1.00) | 1.00 (1.00-1.00) | 1.00 (0.97-1.00) | 1.00 (1.00-1.00) | 1.000 (1.000-1.000) |
| 0.95 | 4 | 0.5  | 1.00 (1.00-1.00) | 1.00 (1.00-1.00) | 1.00 (1.00-1.00) | 1.00 (1.00-1.00) | 1.00 (1.00-1.00) | 1.000 (1.000-1.000) |
| 0.95 | 4 | 0.9  | 1.00 (1.00-1.00) | 1.00 (1.00-1.00) | 1.00 (1.00-1.00) | 1.00 (1.00-1.00) | 1.00 (1.00-1.00) | 1.000 (1.000-1.000) |
| 0.95 | 5 | 0    | 0.93 (0.87-0.97) | 0.39 (0.27-0.50) | 0.97 (0.96-0.97) | 0.25 (0.14-0.40) | 0.91 (0.85-0.94) | 0.832 (0.759-0.897) |
| 0.95 | 5 | 0.01 | 0.95 (0.89-0.99) | 0.52 (0.38-0.76) | 0.97 (0.97-0.99) | 0.40 (0.19-0.70) | 0.93 (0.87-0.97) | 0.899 (0.803-0.978) |
| 0.95 | 5 | 0.05 | 0.99 (0.96-1.00) | 0.84 (0.64-0.98) | 0.99 (0.98-1.00) | 0.80 (0.48-0.99) | 0.98 (0.95-1.00) | 0.987 (0.944-1.000) |
| 0.95 | 5 | 0.1  | 1.00 (0.98-1.00) | 0.96 (0.85-1.00) | 1.00 (0.99-1.00) | 0.94 (0.71-1.00) | 0.99 (0.97-1.00) | 0.999 (0.990-1.000) |
| 0.95 | 5 | 0.2  | 1.00 (1.00-1.00) | 1.00 (1.00-1.00) | 1.00 (1.00-1.00) | 1.00 (0.96-1.00) | 1.00 (1.00-1.00) | 1.000 (1.000-1.000) |
| 0.95 | 5 | 0.5  | 1.00 (1.00-1.00) | 1.00 (1.00-1.00) | 1.00 (1.00-1.00) | 1.00 (1.00-1.00) | 1.00 (1.00-1.00) | 1.000 (1.000-1.000) |
| 0.95 | 5 | 0.9  | 1.00 (1.00-1.00) | 1.00 (1.00-1.00) | 1.00 (1.00-1.00) | 1.00 (1.00-1.00) | 1.00 (1.00-1.00) | 1.000 (1.000-1.000) |

Perturbed datasets in which  $s\%$  ( $s\%=5\%, 10\%, 20\%, 30\%, 40\%$  or  $50\%$ ) of the cases were designated to be therapy sensitive were generated. Within the  $1-s\%$  resistant cases,  $w$  allocated the cases randomly into  $n$  ( $n=2, 3, 4, 5$ ) equally sized groups of resistance mechanisms. For each  $n$ th resistance mechanism, 100 genes were selected as the "true" signatures, of which  $o\%$  ( $o\%=0\%, 1\%, 5\%, 10\%, 20\%, 50\%, 90\%$ ) of the 100 genes were common to all  $n$  mechanisms. The selected genes were then spiked-in by  $v$  ( $v=1$ , top;  $v=0.5$ , middle;  $v=1.5$ , bottom). Classification was performed using diagonal discriminant linear analysis (DLDA). For each combination of  $s$ ,  $n$  and  $o$ , we repeated the spiking and classification 100 times. The mean value and the 95% confidence intervals of the performance measures for each combination of  $s$ ,  $n$  and  $o$  are shown. Performance measures reported here are sensitivity, specificity, positive predictive value (PPV), negative predictive value (NPV), accuracy and the area under curve (AUC) of the receiver operating characteristic (ROC) curves.
